1 **Targeted Sequencing Workflows for Comprehensive Drug Resistance**  
2 **Profiling of *Mycobacterium tuberculosis* cultures using Illumina MiSeq and**  
3 **Nanopore MinION: Comparison of analytical and diagnostic performance,**  
4 **turnaround time and cost**

5  
6 **Ketema TAFESS<sup>1, 2</sup>, Timothy Ting Leung NG<sup>1</sup>, Hiu Yin LAO<sup>1</sup>, Kenneth Siu Sing**  
7 **Leung<sup>3</sup>, Kingsley King Gee TAM<sup>3</sup>, Rahim Rajwani<sup>1</sup>, Sarah Tsz Yan TAM<sup>1</sup>, Lily Pui Ki**  
8 **HO<sup>1</sup>, Corey Mang Kiu CHU<sup>1</sup>, Dimitri GONZALEZ<sup>4</sup>, Chalom SAYADA<sup>4</sup>, Oliver Chiu**  
9 **Kit MA<sup>5</sup>, Belete Haile NEGA<sup>6</sup>, Gobena AMENI<sup>6</sup>, Wing Cheong YAM<sup>2</sup>, Gilman Kit**  
10 **Hang SIU<sup>1\*</sup>**

11  
12 <sup>1</sup> Department of Health Technology and Informatics, The Hong Kong Polytechnic University,  
13 Hong Kong Special Administrative Region, China

14  
15 <sup>2</sup> Department of Medical Laboratory, College of Health Sciences, Arsi University, Asella,  
16 Ethiopia.

17  
18 <sup>3</sup> Department of Microbiology, Queen Mary Hospital, The University of Hong Kong, Hong  
19 Kong Special Administrative Region, China

20  
21 <sup>4</sup> Advanced Biological Laboratories (ABL), F-57070 Metz, France.

22  
23 <sup>5</sup> KingMed Diagnostics, Science Park, Hong Kong Special Administrative Region, China

24  
25 <sup>6</sup> Aklilu Lemma Institute of Pathobiology, Addis Ababa University, Addis Ababa, Ethiopia

26  
27  
28  
29 \*Correspondence: Gilman Kit Hang Siu

30 Address: Y928, 9/F, Block Y, The Hong Kong Polytechnic University, Hung Hom,  
31 Kowloon, Hong Kong.

32 Email: [gilman.siu@polyu.edu.hk](mailto:gilman.siu@polyu.edu.hk)

33  
34 **Keywords:** *Mycobacterium tuberculosis*, Next-generation sequencing, Illumina MiSeq,  
35 Nanopore MinION, Targeted Sequencing, multidrug resistance, Diagnostic  
36 performance

## 37 **Abstract**

38

39 The emergence of *Mycobacterium tuberculosis* strains with complex drug resistance profiles  
40 necessitates a rapid and extensive drug susceptibility test for comprehensive guidance of  
41 patient treatment. Here, we developed two targeted-sequencing workflows based on Illumina  
42 MiSeq and Nanopore MinION for the prediction of drug resistance in *M. tuberculosis*  
43 towards 12 anti-tuberculous agents.

44 A total of 163 *M. tuberculosis* cultured isolates collected from Hong Kong and Ethiopia were  
45 subjected to a multiplex PCR for simultaneous amplification of 19 drug-resistance associated  
46 genetic regions. The amplicons were then barcoded and sequenced in parallel on MiSeq and  
47 MinION in respective batch sizes of 24 and 12 samples. Both platforms successfully  
48 sequenced all samples with average depths of coverage of 1,127× and 1,649× respectively.  
49 Utilizing a self-developed Web-based bioinformatics pipeline, Bacteriochek-TB, for variant  
50 analysis, we found that the MiSeq and MinION result could achieve 100% agreement if  
51 variants with an allele frequency of <40% reported by MinION were excluded. For drug  
52 resistance prediction, both workflows achieved an average sensitivity of 94.8% and  
53 specificity of 98.0% when compared with phenotypic drug susceptibility test. The turnaround  
54 times for the MiSeq and MinION workflows were 38 and 15 hours, facilitating the delivery  
55 of treatment guidance at least 17-18 days earlier than pDST respectively. The higher cost per  
56 sample on the MinION platform (US\$71.56) versus the MiSeq platform (US\$67.83) was  
57 attributed to differences in batching capabilities.

58 Our study demonstrated the interchangeability of MiSeq and MinION sequencing workflows  
59 for generation of accurate and actionable results for the treatment of tuberculosis.

60

## 61 **Importance**

62 TB therapy involving different combinations of antibiotics have been introduced to address  
63 the issue of drug resistance. However, this practice has led to increasing numbers of *M.*  
64 *tuberculosis* with complex drug resistance profiles. Molecular assays for rapid and  
65 comprehensive drug resistance profiling of *M. tuberculosis* are lacking.

66 Here, we described targeted-sequencing workflows based on Illumina MiSeq and Nanopore  
67 MinION for the detection of drug resistance mutations scattered across 19 genetic regions in  
68 *M. tuberculosis*. A bioinformatics pipeline was also developed to translate raw datasets into  
69 clinician-friendly reports that provide comprehensive genetic information for the prediction  
70 of drug resistance towards 12 antibiotics.

71 This is the first study to evaluate and compare the uses of Illumina and Nanopore platforms  
72 for diagnosis of drug-resistant tuberculosis. Remarkably, our diagnostic strategy is  
73 compatible with different sequencing platforms that can be applied in diagnostic centres with  
74 different levels of throughput and financial support for TB diagnosis.

## 75 **Introduction**

76

77 Tuberculosis (TB) remains an enormous public health challenge. Epidemics of TB are fuelled  
78 by the emergence and spread of drug-resistant strains of *Mycobacterium tuberculosis*. Despite  
79 the initiation of combination therapies, the bacteria develop complex drug resistance profiles,  
80 resulting in multidrug-resistant TB (MDR-TB), extensively drug-resistant TB (XDR-TB)  
81 and, more recently, totally drug-resistant TB (TDR-TB) (1).

82 Culture-based phenotypic drug susceptibility tests (pDSTs) are considered the gold standard  
83 for determination of drug resistance in *M. tuberculosis*. However, the long turnaround time  
84 hinders the delivery of actionable results for early chemotherapeutic guidance (2-4).  
85 Molecular diagnostic methods, such as GenoType MTBDRplus (5, 6) and Xpert MTB/RIF  
86 assay (7), were developed for the rapid diagnosis of MDR-TB. Nevertheless, these methods  
87 are limited to hotspot mutations and provide only partial data on drug susceptibility (8, 9).  
88 Data from the World Health Organisation (WHO) indicate that an estimated 50% of drug-  
89 resistant TB cases remain undetected and are not treated appropriately (10). Therefore, rapid,  
90 accurate and comprehensive diagnostic tools for the identification of drug-resistant TB is  
91 remain urgently needed.

92 The use of next-generation sequencing (NGS) to detect drug resistance associated mutations  
93 and enable comprehensive drug resistance profiling represents a promising approach to  
94 clinical care. For high-income countries with low TB burdens, whole-genome sequencing  
95 (WGS) is an attractive approach because genomic data can be used for transmission tracing  
96 and epidemiological investigations, as well as the determination of drug resistance (11, 12).  
97 However, in TB-endemic low-middle income countries (LMICs), sequencing efforts should  
98 focus on genetic regions associated with drug resistance to maximise sample batching in a  
99 single sequencing run. Amplicon-targeted sequencing is a more appropriate option in this  
100 scenario(13).

101 Currently, Illumina MiSeq is the most widely used platform for clinical applications (8, 11,  
102 12, 14). Despite its accuracy and large data output, the high instrument and maintenance costs  
103 may not be affordable by clinical centres intended for individualized care.

104 The Nanopore MinION, a recently introduced sequencing device, is portable, reasonably  
105 priced and lacks maintenance requirements (15). This device requires only a laptop computer  
106 for operations and can be set up easily in any laboratory or regional chest clinic. However,  
107 the low sequencing accuracy is a well-known disadvantage of this platform (16, 17). A

108 comprehensive evaluation of the applicability and reliability of the MinION platform for the  
109 diagnosis of drug-resistant TB remains lacking.

110 A new diagnostic strategy compatible with different sequencing platforms that can be applied  
111 in diagnostic centres with different levels of throughput and financial support is beneficial to  
112 global control of drug-resistant TB. To this end, we developed two targeted-sequencing  
113 workflows based on Illumina MiSeq and Nanopore MinION, respectively, for the detection  
114 of drug resistance mutations scattered across 19 genetic regions in *M. tuberculosis*. A Web-  
115 based bioinformatics pipeline was also developed to translate raw sequencing datasets into  
116 clinician-friendly reports that provide comprehensive genetic information for the prediction  
117 of drug resistance towards 12 anti-tuberculous agents. The two platforms were assessed and  
118 compared in terms of the sequencing performance, agreement in variant calling, reagent costs  
119 and time to reporting. The diagnostic performance of the sequencing results was also  
120 evaluated against pDST. To the best of our knowledge, this is the first study to evaluate and  
121 compare the uses of Illumina and Nanopore platforms for drug resistance profiling of *M.*  
122 *tuberculosis* using targeted-sequencing approach.

123

124

125 **Materials and Methods**

126

127 ***M. tuberculosis* Clinical Isolates**

128 The study included 163 *M. tuberculosis* clinical isolates collected from Ethiopia and Hong  
129 Kong. Seventy isolates were collected from patients at the TB clinic of Asella Hospital in  
130 Ethiopia between January and September 2015. The remaining 90 isolates were collected at  
131 TB laboratory of Hong Kong West Cluster of Hospital Authority, which specialises in chest  
132 medicine and TB, between April 2003 and January 2017. All isolates were stored at -80°C  
133 and revived using the Mycobacterial Growth Indicator Tube 960 (MGIT 960) system at 37°C  
134 for 14 days prior to analysis.

135

136 **DNA Isolation and purification:** Fourteen-day *M. tuberculosis* cultures in MGIT broth were  
137 heat-killed at 80°C for 60 min. Crude DNA extracts were prepared using the alkaline lysis  
138 method, as previously described (18). DNA extracts from Ethiopia were shipped to Hong  
139 Kong for subsequent processing. All DNA extracts were then purified using 1.8× AMPure  
140 XP beads (Beckman Coulter, US).

141

142 **Drug Resistance Mutation Panel.** Our targeted sequencing platforms focused on 19 genetic  
143 regions which were associated with phenotypic resistance to 12 anti-TB agents, namely  
144 isoniazid (INH), rifampicin (RIF), ethambutol (EMB), pyrazinamide (PZA), ofloxacin  
145 (OFX), moxifloxacin (MOX), kanamycin (KAN), amikacin (AMK), capreomycin (CAP),  
146 streptomycin (STR), linezolid (LZD) and bedaquiline (BDQ).

147 A drug resistance mutation panel was constructed and incorporated into our sequencing  
148 analysis pipeline, Bacteriochek-TB, for automatic reporting of drug resistance mutations.

149 Initially, we created the panel based on the three published databases (TBDRaMDB,  
150 MUBII-TB-DB, RESEQTB.ORG) because these constitute a comprehensive resource for  
151 drug resistance mutations in *M. tuberculosis* and include all studies published from January  
152 1966 to March 2013 (19-21). However, the information in these databases is limited to first-  
153 line drugs and several second-line drugs. Therefore, we also searched for additional  
154 publications that reported mutations associated with resistance to CAP, LZD and BDQ, as  
155 well as all literature related to resistance mutations in *M. tuberculosis* since the release of the  
156 latest databases (March 2013–January 2019). All publications were reviewed carefully to  
157 ensure the consistency of information regarding the mutated nucleotides and amino acids (22-  
158 43). A flowchart of the process of selecting mutations for our panel is presented in

159 Supplementary Figure 1. Eventually, 267 genetic mutations scattered across 19 loci were  
160 included in our panel (**Table 1** and **Supplementary Table 1**).  
161

| <b>Table 1 The target loci and mutations included in our drug resistance mutation panel</b> |                                               |                                                                    |                                                                                                                                                                                                                                                                                                                                                                                                                                                                                                                                                                                                                                                                                                                                                                                                                                                                                                                                                                                                                                                                                                                                                                                                                       |
|---------------------------------------------------------------------------------------------|-----------------------------------------------|--------------------------------------------------------------------|-----------------------------------------------------------------------------------------------------------------------------------------------------------------------------------------------------------------------------------------------------------------------------------------------------------------------------------------------------------------------------------------------------------------------------------------------------------------------------------------------------------------------------------------------------------------------------------------------------------------------------------------------------------------------------------------------------------------------------------------------------------------------------------------------------------------------------------------------------------------------------------------------------------------------------------------------------------------------------------------------------------------------------------------------------------------------------------------------------------------------------------------------------------------------------------------------------------------------|
| <b>Drug or Drug Class</b>                                                                   | <b>Genetic Regions Involved In Resistance</b> | <b>Gene Function</b>                                               | <b>Common Mutations<sup>1</sup></b>                                                                                                                                                                                                                                                                                                                                                                                                                                                                                                                                                                                                                                                                                                                                                                                                                                                                                                                                                                                                                                                                                                                                                                                   |
| Isoniazid (IHN)                                                                             | <i>katG</i>                                   | Catalase-peroxidase                                                | Trp90stop, Arg104Leu, Trp107stop, His108Gln, Thr262Arg, Thr275Pro, Gly279Asp, Gly285Asp, Trp300Pro, Ser302Arg, Ser315Thr, Ser315Asn, Ser315Arg, Ser315Ile, Gly316Asp, Trp328Gly, Ala350Ser, Gln434stop, Arg515Cys, Lys521ins64bp, Gly593Asp, Lys617insAC, Gly629Ser, Ala716Pro                                                                                                                                                                                                                                                                                                                                                                                                                                                                                                                                                                                                                                                                                                                                                                                                                                                                                                                                        |
|                                                                                             | <i>Rv1910c - furA</i> intergenic region       | Regulation of KatG expression                                      | -12 G>A, -10 A>C, -7 G>A                                                                                                                                                                                                                                                                                                                                                                                                                                                                                                                                                                                                                                                                                                                                                                                                                                                                                                                                                                                                                                                                                                                                                                                              |
|                                                                                             | <i>mabA (fabG)-inhA</i>                       | enoyl ACP reductase                                                | -17 G>T, -15 C>T, -8 T>A, -8 T>C, Ile21Val, Ile21Thr, Ser94Ala                                                                                                                                                                                                                                                                                                                                                                                                                                                                                                                                                                                                                                                                                                                                                                                                                                                                                                                                                                                                                                                                                                                                                        |
| Rifampicin (RIF)                                                                            | <i>rpoB</i>                                   | β-subunit of RNA polymerase                                        | Val146Phe, Leu511Val, Leu511Pro, Gln513Leu, Gln513Lys, Gln513stop, Gln513insTTC, Gln513insTTCATG, Gln513insCAATTC, Gln513delCATTC, Gln513delAATTCATGG, Phe514Leu, Asp516Gly, Asp516Val, Asp516Tyr, Asp516Phe, Gln517Leu, Ser522Leu, Ser522Gln, His526Pro, His526Gln, His526Tyr, His526Asp, His526Arg, His526CCys, His526Leu, Lys527Asn, Arg528Pro, Ser531Leu, Ser531Phe, Ser531Trp, Leu533Pro, Ile572Phe, Ser574Leu                                                                                                                                                                                                                                                                                                                                                                                                                                                                                                                                                                                                                                                                                                                                                                                                   |
| Pyrazinamide (PZA)                                                                          | <i>pncA</i>                                   | Pyrazinamidase                                                     | 12 T>C, Ala3Glu, Ala3Pro, Ile6Thr, Val7Gly, Asp8Gly, Val9Ala, Val9Gly, Gln10Pro, Asp12Ala, Asp12Asn, Phe13Ser, Cys14Arg, Gly17Asp, Leu19Arg, Leu19Pro, Val21Gly, Tyr34Asp, Tyr34Ser, Leu35Pro, Leu35Arg, Tyr41stop, His43Pro, Val45Gly, Ala46Val, Thr47Ala, Asp49Gly, Asp49Ala, His51Arg, His51Gln, His51Tyr, His51Pro, Asp53Ala, Pro54Thr, His57Asp, His57Arg, His57Tyr, His57Pro, Thr61Pro, Asp63Gly, Trp66Pro, Ser67Pro, Trp68Pro, Trp68Arg, Trp68Gly, His71Asp, His71Tyr, His71Arg, Cys72Arg, Thr76Pro, Gly78Asp, His82Arg, Leu85Pro, Leu85Arg, Ile90Ser, Phe94Leu, Phe94Ser, Lys96Asn, Gly97Asp, Gly97Ser, Tyr99Stop, Tyr103His, Tyr103Ser, Tyr103Stop, Ser104Arg, Gly108Arg, Thr114Pro, Leu116Arg, Trp119Arg, Trp119insAGGTCGATG, Leu120Pro, Val125Asp, Val125Gly, Val128Gly, Val130Gly, Gly132Asp, Gly132Ser, Ala134Val, Thr135Asn, Thr135Pro, His137Arg, Cys138Tyr, Val139Gly, Val139Leu, Val139Met, Val139Ala, Arg140Ser, Gln141Pro, Thr142Ala, Thr142Lys, Thr142Met, Ala143Asp, Ala146Val, Arg148Ser, Val155Gly, Leu159Pro, Leu159Arg, Thr160Pro, Ala161Pro, Gly162Asp, Thr168Ile, Ala171Pro, Ala171Val, Ala171Glu, Leu172Pro, Met175Thr, Met175Val, Leu182Ser, Ser185Thr, Thr5Ser, Asp123Ala, Ala438delGCC |
|                                                                                             | <i>rpsA</i>                                   | Ribosomal protein S1                                               |                                                                                                                                                                                                                                                                                                                                                                                                                                                                                                                                                                                                                                                                                                                                                                                                                                                                                                                                                                                                                                                                                                                                                                                                                       |
| Ethambutol (EMB)                                                                            | <i>embB</i>                                   | Arabinosyltransferases                                             | Gly294Ser, Met306Val, Met306Leu, Gly406Ser, Gly406Ala, Gly406Cys, Gly406Asp, Met423Ile, Gln497Arg, Gly745Asp                                                                                                                                                                                                                                                                                                                                                                                                                                                                                                                                                                                                                                                                                                                                                                                                                                                                                                                                                                                                                                                                                                          |
|                                                                                             | <i>ubiA</i>                                   | Decaprenylphosphoryl-d-arabinose synthase                          | Val188Ala, Ala237Val, Arg240Cys, Ala249gly                                                                                                                                                                                                                                                                                                                                                                                                                                                                                                                                                                                                                                                                                                                                                                                                                                                                                                                                                                                                                                                                                                                                                                            |
| Fluoroquinolones (FQs)                                                                      | <i>gyrA</i>                                   | DNA gyrase subunit A                                               | Ala74Ser, Ala74Phe, Thr80Ala, Gly88Ala, Gly88Cys, Asp89Asn, Ala90Val, Ser91Pro, Asp94Gly, Asp94Arg, Asp94His, Asp94Ala, Asp94Asn, Asp94Tyr, Pro102His                                                                                                                                                                                                                                                                                                                                                                                                                                                                                                                                                                                                                                                                                                                                                                                                                                                                                                                                                                                                                                                                 |
|                                                                                             | <i>gyrB</i>                                   | DNA gyrase subunit B                                               | Asp461His, Asp461Asn, Asp461Ala, Gly470Ala, Asp494Ala, Asn499Asp, Glu501val                                                                                                                                                                                                                                                                                                                                                                                                                                                                                                                                                                                                                                                                                                                                                                                                                                                                                                                                                                                                                                                                                                                                           |
| Streptomycin (STR)                                                                          | <i>rpsL</i>                                   | 12S ribosomal protein                                              | Lys43Arg, Lys88Gln, Lys88Arg                                                                                                                                                                                                                                                                                                                                                                                                                                                                                                                                                                                                                                                                                                                                                                                                                                                                                                                                                                                                                                                                                                                                                                                          |
|                                                                                             | <i>rrs</i>                                    | 16S rRNA                                                           | 462C>T, 492C>T, 513C>T, 514A>C, 514A>T, 516C>T, 517C>T, 799C>T, 907A>T, 907A>C                                                                                                                                                                                                                                                                                                                                                                                                                                                                                                                                                                                                                                                                                                                                                                                                                                                                                                                                                                                                                                                                                                                                        |
| Kanamycin / Amikacin                                                                        | <i>rrs</i>                                    | 16S rRNA                                                           | 1401A>G, 1402C>T, 1484G>T                                                                                                                                                                                                                                                                                                                                                                                                                                                                                                                                                                                                                                                                                                                                                                                                                                                                                                                                                                                                                                                                                                                                                                                             |
|                                                                                             | <i>eis</i> <sup>2</sup>                       | Aminoglycoside acetyltransferase                                   | -10G>A, -14C>T, -37G>T                                                                                                                                                                                                                                                                                                                                                                                                                                                                                                                                                                                                                                                                                                                                                                                                                                                                                                                                                                                                                                                                                                                                                                                                |
|                                                                                             | <i>whiB7</i>                                  | Transcriptional regulator of <i>eis</i> and <i>tap</i> efflux pump | 86delC, 124delC, 128delG, 133delC, 133-134 insC, 179delG                                                                                                                                                                                                                                                                                                                                                                                                                                                                                                                                                                                                                                                                                                                                                                                                                                                                                                                                                                                                                                                                                                                                                              |
| Capreomycin (CAP)                                                                           | <i>rrs</i>                                    | 16S rRNA                                                           | 1401A>G, 1402C>T, 1484G>T                                                                                                                                                                                                                                                                                                                                                                                                                                                                                                                                                                                                                                                                                                                                                                                                                                                                                                                                                                                                                                                                                                                                                                                             |
|                                                                                             | <i>tlyA</i>                                   | rRNA methyltransferase                                             | Asn236Lys                                                                                                                                                                                                                                                                                                                                                                                                                                                                                                                                                                                                                                                                                                                                                                                                                                                                                                                                                                                                                                                                                                                                                                                                             |
| Linezolid (LZD)                                                                             | <i>rrl</i>                                    | 23S rRNA                                                           | 2061G>T, 2270G>C, 2270G>T, 2294G>A, 2299G>T, 2576G>T, 2689A>T, 2746G>A, 2810A>T, 2814G>T, 2848C>A                                                                                                                                                                                                                                                                                                                                                                                                                                                                                                                                                                                                                                                                                                                                                                                                                                                                                                                                                                                                                                                                                                                     |
|                                                                                             | <i>rplC</i>                                   | 50S ribosomal protein L3                                           | Cys154Arg                                                                                                                                                                                                                                                                                                                                                                                                                                                                                                                                                                                                                                                                                                                                                                                                                                                                                                                                                                                                                                                                                                                                                                                                             |
| Bedaquiline (BDQ)                                                                           | <i>atpE</i>                                   | ATP synthase                                                       | Asp28Val, Asp28Gln, Glu61Asp, Ala63Pro, Ala63Val                                                                                                                                                                                                                                                                                                                                                                                                                                                                                                                                                                                                                                                                                                                                                                                                                                                                                                                                                                                                                                                                                                                                                                      |
|                                                                                             | <i>Rv0678</i>                                 | Transcriptional repressor of efflux pump                           | Met1Ala, Arg50Trp, Ser52Phe, Ala59Val, Ala62Val, Ser63Gly, Leu117Arg                                                                                                                                                                                                                                                                                                                                                                                                                                                                                                                                                                                                                                                                                                                                                                                                                                                                                                                                                                                                                                                                                                                                                  |

<sup>1</sup>Nucleotide positions refer to H37Rv genome (NC\_000962.3)

<sup>2</sup>Promoter mutations in *eis* confer only KAN resistance but not AMK resistance.



164 **Multiplex PCR:** A multiplex PCR was developed for simultaneous amplification of 19  
165 genetic loci. Primers for each targeted locus were designed to amplify amplicon sizes ranging  
166 from a minimum of 459 bp (*atpE*) to a maximum of 1601 bp (*rpsA*). Separate sets of primers  
167 were designed for the nanopore MinION and Illumina MiSeq sequencing workflows. Primers  
168 for MinION sequencing contained a universal tail at the 5' end to facilitate barcoding PCR  
169 and downstream library preparation (**Fig.1**), while primers for Illumina MiSeq contained only  
170 target-specific regions. The sizes of the targeted loci varied by an average of 63 bp to ensure  
171 that distinct bands would be visible during electrophoresis (**Supplementary Fig.2**). During  
172 multiplex PCR, the target loci were amplified in a total reaction volume of 50  $\mu$ l, which  
173 included 1X KAPA HiFI Hotstart Ready Mix (Roche Sequencing and Life Science, USA),  
174 0.5  $\mu$ M of each primer (final concentration), 12% GC enhancer (New England BioLabs,  
175 USA), and 2  $\mu$ l of purified DNA extract. Amplification was conducted with the following  
176 settings: an initial activation at 95°C for 4 min, 35 cycles of denaturation at 95°C for 30 s,  
177 annealing at 63°C for 90 s and extension at 72°C for 90 s and a final extension step at 72°C  
178 for 10 min.  
179

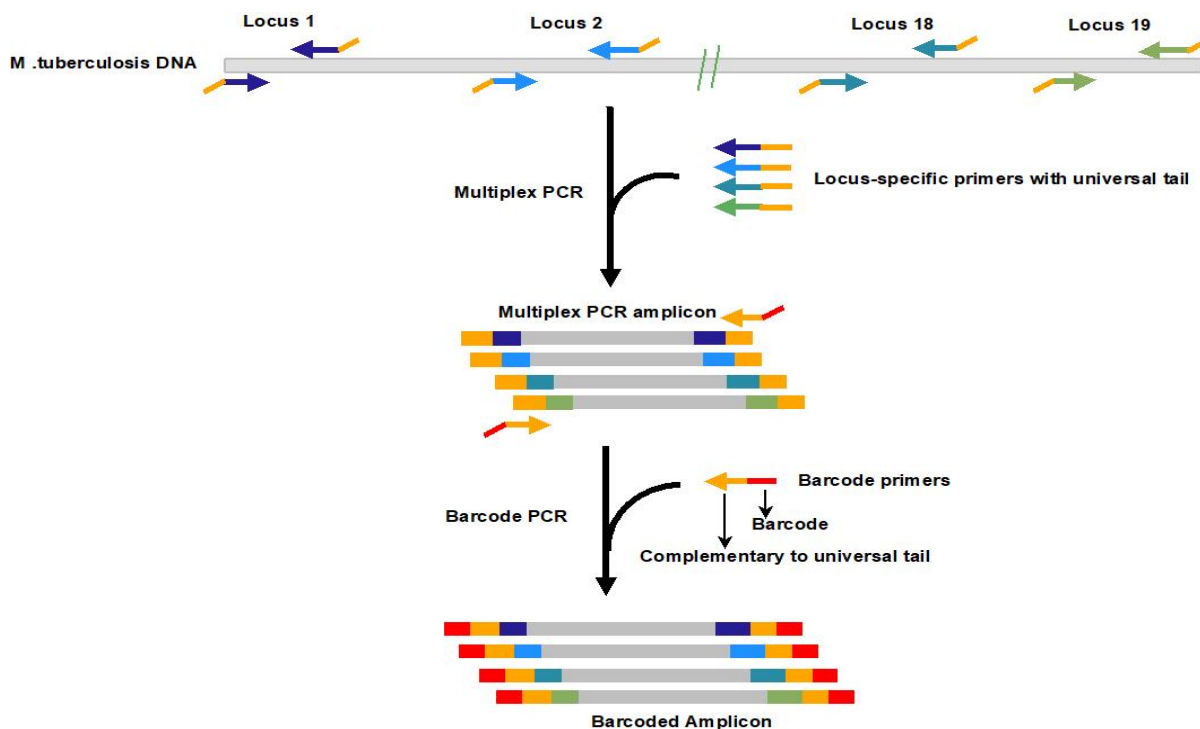

180  
181  
182 **Figure 1:** Schematic diagram illustrating multiplex and barcoding PCR amplification for  
183 Nanopore MinION platform. Genomic DNA was first amplified with primers containing a  
184 universal tail. The 19-plex amplicons were then indexed with barcodes specific to the  
185 universal tail that allows the pooling of 12 samples.

186 **Illumina MiSeq Sequencing:** DNA libraries were prepared and barcoded using the  
187 QIAGEN® QIAseq FX DNA Library Kit (Qiagen, USA) according to the manufacturer's  
188 instructions. The quantity and quality of the DNA library were checked using Qubit  
189 fluorimeter and Agilent Bioanalyzer 2100, respectively. The final library input for cluster  
190 formation was determined using the QIAseq™ Library Quant Assay Kit (Qiagen). The  
191 library was normalised, pooled, denatured, spiked with PhiX Control V3 (5%) to ensure base  
192 diversity in the amplicons and sequenced using MS-103-1003 MiSeq Reagent Nano Kit  
193 version 2 (500 cycles) sequencing chemistry ( $2 \times 250\text{bp}$ ) (Illumina). In our clinical settings,  
194 the average *M. tuberculosis* positive culture rate was approximately 20–30 per week.  
195 Therefore, the workflow was optimised for a batch run of 24 barcoded libraries.

196  
197 **Nanopore MinION Sequencing:** All samples were analysed using ligation-based 1D  
198 sequencing approach (SQK\_LSK108). In brief, multiplex PCR amplicons were barcoded  
199 using the PCR Barcoding Expansion 1-12 kit (EXP-PBC001; Oxford Nanopore  
200 Technologies, UK) according to the manufacturer's instructions. Twelve barcoded PCR  
201 amplicons per batch were normalised and pooled to yield a final DNA quantity of 1 µg. End-  
202 repair and dA-tailing were performed using the NEBNext® Ultra™ II End Repair/dA-Tailing  
203 Module (New England Biolabs, USA), followed by bead purification and elution with  
204 nuclease-free water. A minimum pooled library amount of 700 ng was adapter-ligated using  
205 Blunt/TA Ligation Master Mix (New England BioLabs), followed by purification using 0.4×  
206 AMPure XP beads. The purified library was then loaded into a R9.4.1 flow cell (FLO-  
207 MIN106) and sequenced for 6 hours.

208  
209 **Sequencing analysis:** The datasets generated from both platforms were analysed using  
210 BacterioChek-TB, a CE-IVD marked (LU/CA01/IVD/69) Web-based bioinformatics  
211 developed by our team. The software is compatible with targeted or whole-genome  
212 sequencing data in the FASTQ format. After inputting the FASTQ file to the software via  
213 drag-and-drop, the sequences were mapped against *M. tuberculosis* H37Rv (GenBank  
214 accession no. NC\_000962.3) using the Burrows-Wheeler Aligner (BWA), version 0.7.15.  
215 Expert System, an in-house algorithm, was used to call nucleotide and amino-acid variants  
216 from a pileup of aligned read bases. Low-quality variants were removed using a system of  
217 adjustable filters, including (i) a noisy mutation filter, which removes variants called with a  
218 frequency lower than the limit of detection (3% by default) of the sequencing platform, and

219 (ii) an allele frequency filtering, which excludes mutations with an allele frequency below a  
220 defined threshold (10% by default) from the report.

221 The variants which passed the filters were then mapped using the mutation panel to identify  
222 the presence of drug resistance mutations.

223 After the analysis, the software automatically generated two reports. The first, a one-page  
224 clinical report, included the presence of drug resistance mutations with their allele  
225 frequencies and drug resistance interpretations (**Supplementary Fig.3**). The second, a full  
226 report, included all the above information plus other details such as the read coverage of each  
227 target region and the frequencies of insertions, deletions and substitutions at each position  
228 across the targeted regions, regardless of their relevance to drug resistance (**Supplementary**  
229 **Fig.3**).

230

231 **Variant calling agreement between Illumina MiSeq and Nanopore MinION:** The default  
232 allele frequency threshold defined by BacterioChek-TB for variant calling were based on the  
233 sequencing accuracy of the Illumina platforms. These settings were not suitable for Nanopore  
234 sequencing, which has a higher basecalling error. To determine the optimal threshold for  
235 nanopore sequencing, the MinION datasets of a random subset of 20 isolates in our collection  
236 were analysed repeatedly using BacterioChek-TB with various allele frequency threshold  
237 levels ranging from 10% to 50%. The variant calling results at each threshold level were  
238 compared with those generated by the Illumina MiSeq platform at default threshold (10%).  
239 The threshold settings resulting in the highest level of agreement between MiSeq and  
240 MinION were then used for the analysis of the remaining 143 isolates.

241

242 **Analytical sensitivity of MiSeq and MinION platforms to detect mutations in mixed**  
243 **populations of drug-susceptible and drug-resistant isolate:** Genomic DNA were extracted  
244 from a wildtype clinical isolate (ETH\_125) and a XDR-TB clinical isolate (WC-33), which  
245 harboured drug resistance-conferring mutations in *katG*, *rpoB*, *rrs*, *embB*, *gyrA*, and *rpsL*.  
246 DNA concentration was measured and standardised using the Qubit dsDNA HS assay.  
247 WC\_33 DNA was then diluted sequentially with ETH\_125 DNA such that the mutant allele  
248 proportion reduced from 100% to 0%. Three to four replicates of each dilution were prepared  
249 for sequencing. The average frequencies of mutant alleles in each dilution was determined  
250 using the two sequencing platforms.

251

252 **Phenotypic Drug Susceptibility Tests:** pDSTs were conducted using two methods. For first-  
253 line agents, namely RIF (1 µg/ml), INH (0.1 µg/ml and 0.4 µg/ml), EMB (5 µg/ml), STR (1  
254 µg/ml) and PZA (100 µg/ml), the pDST was performed using a liquid-based BACTEC MGIT  
255 960 SIRE kit and BACTEC MGIT 960 PZA kit (44, 45). For second-line agents, including  
256 OFX (2 µg/ml), MOX (0.5 µg/ml), AMK (4 µg/ml), KAN (5 µg/ml) and CAP (10µg/ml), the  
257 agar proportion method was used to determine drug susceptibility patterns according to the  
258 guideline of the Clinical and Laboratory Standards Institute (CLSI). All of the *M.*  
259 *tuberculosis* cultures from Hong Kong (n=93) were subjected to the full panel pDST,  
260 whereas the isolates from the Ethiopia were only subjected to MGIT 960 SIRE tests.  
261 Unfortunately, pDSTs for LZD and BDQ were not performed in this study because of the  
262 lack of a standardised pDST protocol and the unavailability of these drugs in the study  
263 regions.

264

### 265 **Diagnostic Performance Evaluation**

266 The diagnostic sensitivities and specificities for each type of drug resistance in the  
267 BacterioChek-TB reports based on MiSeq and MinION data were determined using standard  
268 methods and compared to the gold-standard pDST results. The adjusted Wald method and  
269 free online software (available from <http://www.measuringusability.com/wald.htm>) were  
270 used to calculate the 95% confidence intervals (95% CI).

271

### 272 **Turnaround Time and Cost Assessment**

273 The sample-to-report times were determined for the MiSeq and MinION methods. Time zero  
274 was defined as the time when the MGIT cultures were subjected to DNA extraction, while the  
275 time-to-report referred to the time when BacterioChek-TB generated a genotypic DST report.  
276 The turnaround times of the sequencing methods were compared with that of pDST.

277 All the cost analyses were based on Hong Kong list prices as of July 2019. For the MiSeq  
278 workflow, the average cost per sample for library preparation, quality control and sequencing  
279 was calculated based on a batch of 24 samples per run. For MinION, the respective cost per  
280 sample was calculated based on a batch of 12 samples per run.

281

### 282 **Statistical analysis**

283 The statistical analysis was performed using GraphPad Prism, version 8.1 (GraphPad Inc.,  
284 USA). Descriptive results, such as the total number of reads per run, number of reads per  
285 sample, read quality and depth of coverage per genetic region obtained by MiSeq and

286 Nanopore sequencing, are expressed as average values. Continuous variables were compared  
287 using the independent t-test or Kruskal–Wallis test and one-way ANOVA followed by  
288 Dunn’s post hoc test. Variables with p values  $\leq 0.05$  were considered statistically significant.

289

290

291 **Results**

292

293 **Quality, Yield and Depth of Coverage of Sequencing Reads Generated by the Illumina**  
294 **MiSeq and Nanopore MinION Platforms**

295

296 For Illumina MiSeq, 163 samples were divided into seven batches of 24 libraries. More than  
297 90% of the bases received scores  $>Q30$  for the paired-end reads. Each sample yielded an  
298 average read number of 106,050 (**Supplementary Table 2**). For Nanopore MinION, the  
299 samples were sequenced in 14 batches of 12 libraries. The average quality score was 10.1 per  
300 run, which corresponds to an approximate accuracy of 90%. Average reads of 57,766 per  
301 sample were obtained after a 6-hour sequencing run (**Supplementary Table 3**).

302 Both MiSeq and MinION successfully sequenced all 19 targeted regions in the 163 samples,  
303 with average depths of coverage of  $1,127\times$  and  $1,649\times$  respectively. However, we observed  
304 that the depth of coverage decreased as the amplicon size increased. For amplicons smaller  
305 than 1,000 bp, the average depths of coverage obtained using MiSeq and MinION were  
306  $1,408\times$  and  $2,386\times$ , respectively, which were significantly higher than the values (i.e.  $815\times$   
307 and  $830\times$ ) obtained from amplicons  $\geq 1,000$  bp [ $t=16.71$ ;  $P=0.0001$  and  $t=12.67$ ;  $P=0.0001$ ,  
308 respectively] (Fig.2). A strong inverse relationship was observed between the amplicon size  
309 and depth of the coverage for both platforms [Pearson correlation ( $r$ )= $-0.82$ ,  $p=0.01$  and ( $r$ )= $-$   
310  $0.91$ ,  $p=0.01$ , respectively].

311

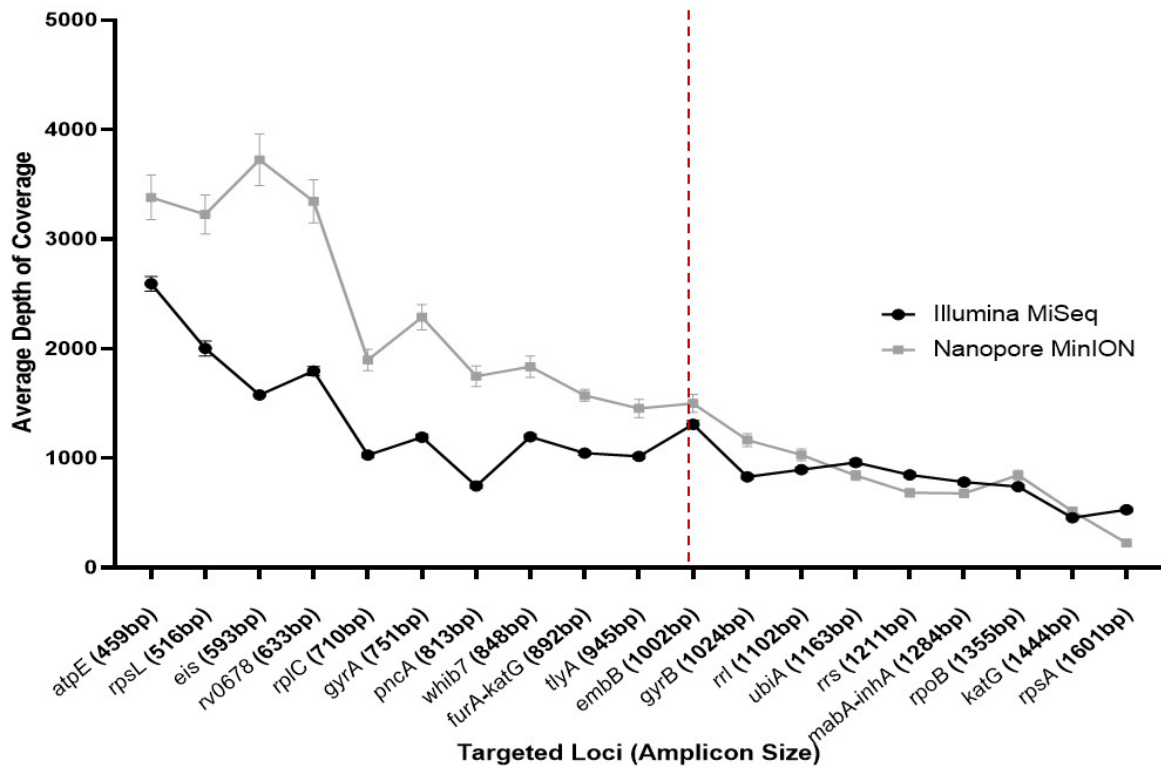

312

313 **Figure 2:** Line graph illustrating the depth of coverage at each locus in MinION and MiSeq  
314 sequences (n=163). Error bars: Standard error of mean (SEM); The reference line (broken  
315 line) indicates the cut-off point (1,000bp) to categorize the amplicon size as long and short

316

317

### 318 Variant Call Percent Agreement between MiSeq and MinION Sequencing

319

320 The variant call percent agreements were 1.84%, 16.78%, 56.58%, 100% and 97.67% for  
321 MinION at allele frequency threshold of 10%, 20%, 30%, 40% and 50% respectively versus  
322 MiSeq using default filter setting (**Fig.3**). The variant calling results were presented in  
323 Supplementary Table 4. The results showed that the MiSeq and MinION result could achieve  
324 100% agreement if variants with an allele frequency of <40% reported by MinION were  
325 excluded.

326

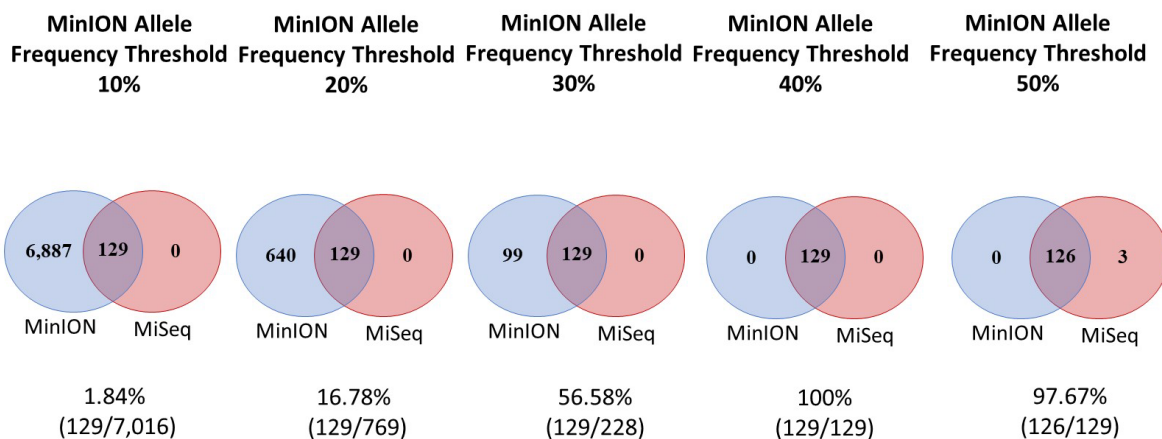

327  
 328 **Figure 3.** Venn diagrams showing the agreement of variant calling between two sequencing  
 329 platforms when the allele frequency threshold was adjusted to 10% (a default setting) for  
 330 Illumina MiSeq and 10-50% for Nanopore MinION. The sum of the number in a circle  
 331 indicates the total number of variants, regardless of their relatedness with drug resistance,  
 332 reported by the respective sequencing platform for a subset of 20 *M. tuberculosis* cultures.

333  
 334  
 335  
 336  
 337  
 338

### Analytical sensitivity of MiSeq and MinION platforms to detect mutations in mixed populations of drug-susceptible and drug-resistant isolate

339 Mixtures of genomic DNA extracted from a pan-susceptible isolate and an XDR-TB isolate,  
 340 which harboured six drug resistance mutations, at different ratios were analysed by MiSeq  
 341 alongside MinION. Notably, the numbers of reads carrying the mutations increased  
 342 proportionally with an increasing mutant/wild type ratio (**Fig.4**). For MiSeq, a drug-resistant  
 343 mutant DNA proportion of at least 20% was required to exceed the allele frequency threshold  
 344 of 10% for all six regions. For MinION, a drug-resistant subpopulation comprising at least  
 345 50% of the sample mixture was required to achieve an allele frequency of 40%.



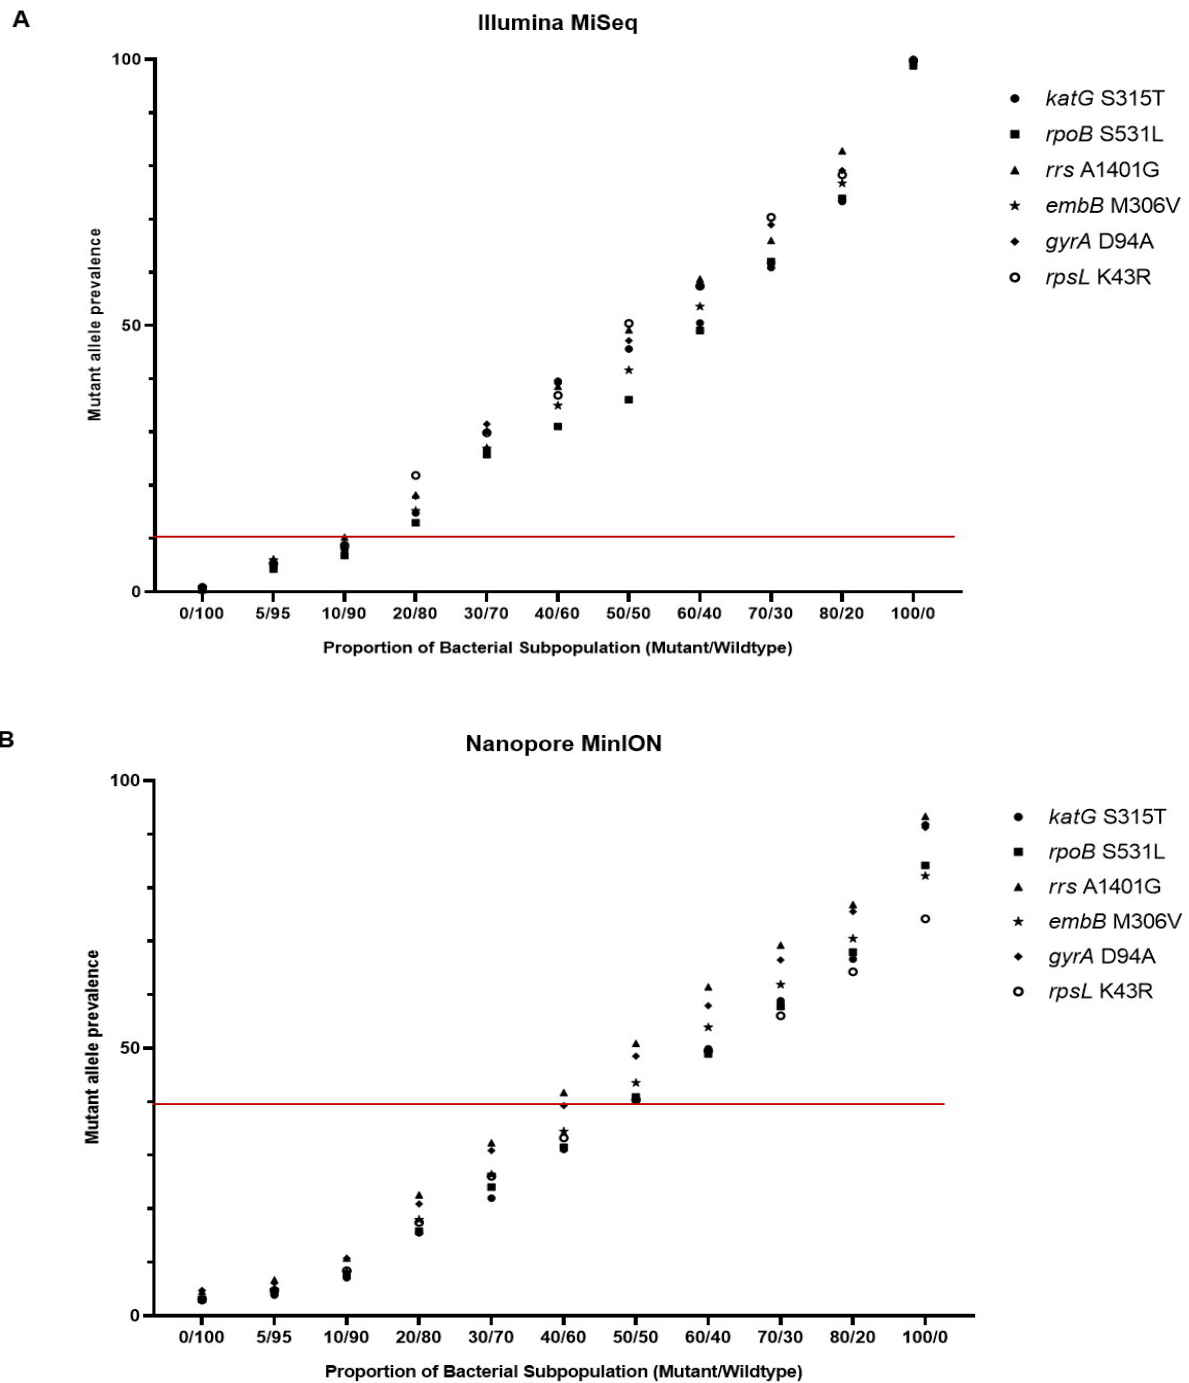

346

347 **Figure 4.** The frequencies of mutant alleles identified by (A) Illumina MiSeq and (B) Nanopore  
348 MinION sequencing platforms in a mixed population of wildtype and mutant at different ratios. The  
349 mutant strain, WC-33, were found to harbour 6 multiple resistance-conferring mutations (*katG*  
350 Ser315Thr, G > C genome position (P) 2155168; *rpoB* Ser531Leu, C > T P 761155; *rrs* A1401G, A  
351 > G P 1473246; *embB* Met306Val, A > G P 4247429; *gyrA* Asp94Ala, A > C P 7582; *rpsL* Lys43Arg,  
352 A > G P 781687). ETH\_125 represent the wildtype strain, which carried pure wildtype alleles at the  
353 respective positions. The red line indicates the respective allele frequency thresholds for MiSeq and  
354 MinION to report a variant by Bacteriochek-TB. The allele proportion was calculated as the total  
355 number of specific allele per total number aligned reads at that specific position for all the replicates.

356

## 357 Phenotypic Drug Susceptibility Patterns of *M. tuberculosis* Cultures

358

359 All 163 *M. tuberculosis* isolates were subjected to the MGIT 960 SIRE test. Of them, 65  
360 (39.9%) isolates were pan-susceptible, 98 (60.1%) were resistant to at least one first-line drug  
361 and 60 (36.8%) were categorised as MDR-TB. The resistance rates to individual drugs are  
362 listed in Table 2.

363 Ninety-three *M. tuberculosis* isolates collected from Hong Kong were further tested for  
364 susceptibilities toward PZA, OFX, MOX, KAN, AMK and CAP. Of them, 30 (32.3%) were  
365 found to be MDR plus resistant to any SLIDs, 20 (21.5%) were MDR plus resistant to FQ  
366 and 10 (10.8%) were categorised as XDR-TB.

367 Unfortunately, pDST data for LZD and BDQ could not be determined in this study because  
368 these antibiotics were unavailable at the study sites (Table 2).

**Table 2: Phenotypic drug resistance profiles of 163 *M. tuberculosis* clinical isolates**

| Drug | Total number of isolates | pDST tested isolates | Number of resistant isolates (%) | Drug resistance patterns (number, %)                                                                                                                                                         |                                    |
|------|--------------------------|----------------------|----------------------------------|----------------------------------------------------------------------------------------------------------------------------------------------------------------------------------------------|------------------------------------|
| INH  | 163                      | 163                  | 87 (53.4)                        | MDR<br>(60, 36.8%)<br><br>MDR + EMB/STR<br>(54, 33.1%)<br><br>MDR + PZA (40, 43.0%) <sup>c</sup><br><br>MDR + SLIDs<br>(30, 32.3%) <sup>c</sup><br><br>MDR + FQs<br>(20, 21.5%) <sup>c</sup> | XDR<br>(10,<br>10.8%) <sup>c</sup> |
| RIF  | 163                      | 163                  | 65 (40.0)                        |                                                                                                                                                                                              |                                    |
| EMB  | 163                      | 163                  | 37 (22.7)                        |                                                                                                                                                                                              |                                    |
| STR  | 163                      | 163                  | 72 (44.2)                        |                                                                                                                                                                                              |                                    |
| PZA  | 163                      | 93 <sup>a</sup>      | 44 (47.3)                        |                                                                                                                                                                                              |                                    |
| KAN  | 163                      | 93 <sup>a</sup>      | 32 (34.4)                        |                                                                                                                                                                                              |                                    |
| AMK  | 163                      | 93 <sup>a</sup>      | 31 (33.3)                        |                                                                                                                                                                                              |                                    |
| CAP  | 163                      | 90 <sup>a</sup>      | 28 (31.1)                        |                                                                                                                                                                                              |                                    |
| OFX  | 163                      | 93 <sup>a</sup>      | 25 (26.9)                        |                                                                                                                                                                                              |                                    |
| MOX  | 163                      | 92 <sup>a</sup>      | 23 (25.0)                        |                                                                                                                                                                                              |                                    |
| BDQ  | 163                      | 0 <sup>b</sup>       | 0                                |                                                                                                                                                                                              |                                    |
| LZD  | 163                      | 0 <sup>b</sup>       | 0                                |                                                                                                                                                                                              |                                    |

INH: Isoniazid, RIF: Rifampicin; EMB: Ethambutol, PZA: Pyrazinamide, STR: Streptomycin, KAN: Kanamycin, AMK: Amikacin, CAP: Capreomycin, OFX: Ofloxacin, MOX: Moxifloxacin, BDQ: Bedaquiline, LZD: Linezolid, MDR: Multi-drug resistance, XDR: Extensively drug resistance, FQ: Fluoroquinolones, SLIDs: Second-line injectable drugs

<sup>a</sup> Based on the routine practice in Asella Hospital in Ethiopia, pDST for *M. tuberculosis* clinical isolates included only INH, RIF, EMB and STR. Therefore, the pDST results for PZA, KAN, AMK, CAP, OFX, MOX were not available for *M. tuberculosis* strains isolated from Ethiopia.

<sup>b</sup> BDQ and LZD pDST results were not available in this study because of unavailability of the respective drugs in our regions

<sup>c</sup> The percentages were calculated based on the total number of *M. tuberculosis* isolates subjected to pDST for PZA, KAN, AMK, CAP, OFX, MOX

## 369 **Diagnostic Performance of MiSeq and MinION Sequencing Workflows for Predicting** 370 **Drug Susceptibility Patterns**

371

372 By applying the respective allele frequency thresholds, the two sequencing platforms deduced  
373 identical genotypic patterns for all 163 isolates. Using pDST as the reference method, the  
374 average sensitivity and specificity of the sequencing-based methods for the detection of drug  
375 resistance in *M. tuberculosis* cultures were 94.8% (95% CI: 92.3–96.6) and 98.0% (95% CI:  
376 96.8–98.8), respectively. Both sequencing platforms correctly identified all MDR-TB (n=60)  
377 and XDR-TB isolates (n=10) in our collection.

378 Regarding the performance for prediction of resistance towards individual drugs, the  
379 diagnostic sensitivities and specificities were presented in **Table 3**.

380 Missense mutations in codon 315 of *katG* and a C-15T nucleotide change in the *mabA-inhA*  
381 promoter region were the most prevalent mutations, accounting for 39.1% and 47.1% of INH  
382 resistance. Majority (75.4%) of RIF-resistant isolates harboured a missense mutation in  
383 codon 531 of *rpoB* (**Table 4**). Mutations in *embB* and *rpsL* that resulted in the amino acid  
384 changes Met306Val and Lys43Arg, respectively, accounted for 75.7% and 68.1% of EMB-  
385 and STR-resistant isolates, respectively. Mutations associated with PZA resistance were  
386 scattered across *pncA*, in which mutation encoding the amino acid change Gly162Asp was  
387 predominant (**Table 4**).

388 For second-line drugs, the majority (64%) of FQ-resistant isolates harboured missense  
389 mutations in codon 94 of *gyrA*, whereas a nucleotide substitution A1401G in *rrs* accounted  
390 for nearly all resistance to SLIDs. Detailed phenotypic and genotypic drug susceptibility  
391 information of each *M. tuberculosis* isolate were presented in Supplementary Table 5.

**Table 3: The diagnostic performance of the MiSeq and MinION sequencing workflows**

| Drug | pDST tested isolates | Number of drug resistant isolates as confirmed by pDST (% of the tested isolates) | Number of drug susceptible isolates as confirmed by pDST (% of the tested isolates) | Number of drug resistant isolates as inferred by sequencing-based method (% of the tested isolates) | Number of drug susceptible isolates as inferred by sequencing-based method (% of the tested isolates) | Sensitivity % (95% CI) | Specificity % (95%CI) |
|------|----------------------|-----------------------------------------------------------------------------------|-------------------------------------------------------------------------------------|-----------------------------------------------------------------------------------------------------|-------------------------------------------------------------------------------------------------------|------------------------|-----------------------|
| INH  | 163                  | 87 (53.4)                                                                         | 76 (46.6)                                                                           | 80 (49.1)                                                                                           | 76 (46.6)                                                                                             | 92.0 (84.1-96.3)       | 100.0 (95.9-100.0)    |
| RIF  | 163                  | 65 (40.0)                                                                         | 98 (60.0)                                                                           | 65 (40.0)                                                                                           | 97 (59.5)                                                                                             | 100.0 (95.2-100.0)     | 99.0 (93.9-99.9)      |
| EMB  | 163                  | 37 (22.7)                                                                         | 126 (77.3)                                                                          | 32 (19.6)                                                                                           | 123 (75.5)                                                                                            | 86.5 (71.6-94.6)       | 97.6 (92.9-99.5)      |
| STR  | 163                  | 72 (44.2)                                                                         | 91 (55.8)                                                                           | 67 (41.1)                                                                                           | 91 (55.8)                                                                                             | 93.1 (84.4-97.3)       | 100.0 (96.5-100.0)    |
| PZA  | 93                   | 44 (47.3)                                                                         | 49 (52.7)                                                                           | 42 (45.2)                                                                                           | 49 (52.7)                                                                                             | 95.5 (84.0-99.6)       | 100.0 (93.7-100.0)    |
| KAN  | 93                   | 32 (34.4)                                                                         | 61 (65.6)                                                                           | 31 (33.3)                                                                                           | 61 (65.6)                                                                                             | 96.9 (82.9-99.9)       | 100.0 (94.9-100.0)    |
| AMK  | 93                   | 31 (33.3)                                                                         | 62 (66.7)                                                                           | 31 (33.3)                                                                                           | 62 (66.7)                                                                                             | 100.0 (90.4-100.0)     | 100.0 (94.9-100.0)    |
| CAP  | 90                   | 28 (31.1)                                                                         | 62 (68.9)                                                                           | 28 (31.1)                                                                                           | 60 (66.7)                                                                                             | 100.0 (89.5-100.0)     | 96.8 (88.3-99.8)      |
| OFX  | 93                   | 25 (26.9)                                                                         | 68 (73.1)                                                                           | 23 (24.7)                                                                                           | 68 (73.1)                                                                                             | 92.0 (73.9-98.9)       | 100.0 (95.4-100.0)    |
| MOX  | 92                   | 23 (25.0)                                                                         | 69 (75.0)                                                                           | 21 (22.8)                                                                                           | 68 (73.9)                                                                                             | 91.3 (72.0-98.8)       | 98.6 (91.5-99.9)      |

INH: Isoniazid, RIF: Rifampicin; EMB: Ethambutol, PZA: Pyrazinamide, STR: Streptomycin, KAN: Kanamycin, AMK: Amikacin, CAP: Capreomycin, OFX: Ofloxacin, MOX: Moxifloxacin

**Table 4: Targeted mutations identified by MiSeq and MinION sequencing workflows for *M. tuberculosis* isolates that were phenotypically resistant to the related drugs**

| Drugs                            | Targeted Loci    | Targeted mutations identified by MiSeq and MinION | Nucleotide change and chromosomal position | Number of isolates resistant to the related drugs confirmed by pDST |
|----------------------------------|------------------|---------------------------------------------------|--------------------------------------------|---------------------------------------------------------------------|
| INH                              | <i>katG</i>      | Ser315Thr                                         | G > C P 2155168                            | 26                                                                  |
|                                  |                  | Ser315Thr                                         | GC > CA P 2155167-2155168                  | 3                                                                   |
|                                  |                  | Ser315Asn                                         | G > A P 2155168                            | 4                                                                   |
|                                  |                  | Ser315Gly                                         | A > G P 2155169                            | 1                                                                   |
|                                  | <i>mabA-inhA</i> | C -15T                                            | C > T P 1673425                            | 41                                                                  |
|                                  |                  | T -8C                                             | T > C P 1673432                            | 4                                                                   |
|                                  |                  | T -8A                                             | C > A P 1673432                            | 1                                                                   |
| No targeted mutations identified |                  |                                                   |                                            | 7                                                                   |
| RIF                              | <i>rpoB</i>      | Ser531Leu                                         | C > T P 761155                             | 49                                                                  |
|                                  |                  | His526Leu                                         | A > T P 761140                             | 5                                                                   |
|                                  |                  | His526Arg                                         | A > G P 761140                             | 2                                                                   |
|                                  |                  | His526Asp                                         | C > G P 761139                             | 2                                                                   |
|                                  |                  | His526Tyr                                         | C > T P 761139                             | 1                                                                   |
|                                  |                  | Leu533Pro                                         | T > C P 761161                             | 2                                                                   |
|                                  |                  | Asp516Val                                         | A > T P 761110                             | 1                                                                   |
|                                  |                  | Gln513STOP                                        | C > T P 761100                             | 1                                                                   |
|                                  |                  | Ile572Phe                                         | A > T P 761277                             | 1                                                                   |
|                                  |                  | Asp516Ser                                         | GA > TT P 761109-761110)                   | 1                                                                   |
| EMB                              | <i>embB</i>      | Met306Val                                         | A > G P 4247429                            | 28                                                                  |
|                                  |                  | Gly406Asp                                         | G > A P 4247730                            | 4                                                                   |
|                                  |                  | No targeted mutations identified                  |                                            |                                                                     |
| PZA                              | <i>pncA</i>      | Thr76Pro                                          | A > C P 2289016                            | 2                                                                   |
|                                  |                  | His51Arg                                          | A > G P 2289090                            | 1                                                                   |
|                                  |                  | Ala143Asp                                         | C > A P 2288814                            | 1                                                                   |
|                                  |                  | Asp12Ala                                          | A > C P 2289207                            | 1                                                                   |
|                                  |                  | Gly162Asp                                         | G > A P 2288757                            | 21                                                                  |
|                                  |                  | Met175Thr                                         | T > C P 2288718                            | 1                                                                   |
|                                  |                  | Ser66Pro                                          | T > C P 2289046                            | 2                                                                   |
|                                  |                  | Trp68Leu                                          | G > T P 2289039                            | 2                                                                   |
|                                  |                  | Cys14Arg                                          | T > C P 2289202                            | 1                                                                   |
|                                  |                  | Val125Asp                                         | T > A P 2288868                            | 2                                                                   |
|                                  |                  | Val7Gly                                           | T > G P 2289222                            | 1                                                                   |
|                                  |                  | Thr168Ile                                         | C > T P 2288739                            | 1                                                                   |
|                                  |                  | Asp63Gly                                          | A > G P 2289054                            | 1                                                                   |
|                                  |                  | Leu182Ser                                         | T > C P 2288697                            | 1                                                                   |
|                                  |                  | Gly132Asp                                         | G > A P 2288847                            | 1                                                                   |
|                                  |                  | Ile90Ser                                          | T > G P 2288973                            | 1                                                                   |
|                                  |                  | Phe13Ser                                          | T > G P 2289204                            | 1                                                                   |
|                                  |                  | No targeted mutations identified                  |                                            |                                                                     |
| STR                              | <i>rpsL</i>      | Lys43Arg                                          | A > G P 781687                             | 49                                                                  |
|                                  |                  | Lys88Arg                                          | A > G P 781822                             | 7                                                                   |
|                                  | <i>rrs</i>       | A514C                                             | A > C P 1472359                            | 3                                                                   |
|                                  |                  | C517T                                             | C > T P 1472362                            | 7                                                                   |
|                                  |                  | C492T                                             | C > T P 1472337                            | 1                                                                   |
| No targeted mutations identified |                  |                                                   |                                            | 5                                                                   |
| AMK, KAN, CAP                    | <i>rrs</i>       | A1401G                                            | A > G P 1473246                            | 31, 31, 28 <sup>a</sup>                                             |
|                                  |                  | No targeted mutations identified                  |                                            |                                                                     |
| OFX, MOX                         | <i>gyrA</i>      | Asp94Ala                                          | A > C P 7582                               | 4                                                                   |
|                                  |                  | Asp94Arg                                          | A > G P 7582                               | 5                                                                   |
|                                  |                  | Asp94Gly                                          | A > G P 7582                               | 4                                                                   |
|                                  |                  | Asp94His                                          | G > C P 7581                               | 1                                                                   |
|                                  |                  | Asp94Asn                                          | G > A P 7581                               | 2                                                                   |
|                                  |                  | Ala90Val                                          | C > T P 7570                               | 4                                                                   |
|                                  |                  | Ser91Pro                                          | T > C P 7572                               | 1                                                                   |
|                                  |                  | Ala74Phe                                          | G > T P 7521                               | 1                                                                   |
|                                  |                  | Ala74Phe + Ala90Val                               | G > T P 7521 + C > T P 7570                | 1                                                                   |

<sup>a</sup>The number of resistant and susceptible isolates for AMK, KAN, CAP varies as indicated

## Discordance between pDST and Sequencing-Based Workflows

Discordant genotypic and phenotypic resistance data were observed for some isolates (**Table 5**). Seven isolates which were phenotypically resistant to INH were inferred as susceptible by both sequencing workflows. Four of these isolates were found to harbour *katG* mutations outside our target panel and three of them did not have any variants identified in related targeted regions. Moreover, an isolate harboured a high-confidence mutation at codon 526 of *rpoB* was found to be phenotypically susceptible to RIF.

Sequencing-based workflows also failed to identify two (4.5%) PZA-resistant isolates. One isolate harboured a nucleotide deletion in *pncA*, whereas the other did not harbour any mutations in *pncA* or *rpsA*. Both the MiSeq and MinION workflows missed five STR- and EMB-resistant isolates. No known drug resistance mutations were detected in *rrs* and *rpsL* for any of the five STR-resistant isolates, whereas out-of-panel *embB* mutations were detected in four of the EMB-resistant isolates. Moreover, three isolates harbouring a high-confidence mutation, *embB* Met306Val, were identified as phenotypically susceptible to EMB.

Two FQ-resistant isolates harboured out-of-panel mutations in *gyrA* and *gyrB*. One isolate carrying a targeted mutation in *gyrA*, which caused the amino acid change Asp94Arg, was resistant to OFX but susceptible to MOX.

Only one (3.2%) SLIDs-resistant isolate was not detected by the sequencing tests. Although this isolate was phenotypically resistant to KAN, no targeted mutations were detected in *rrs*, *eis* or *whiB7*. Two isolates harbouring the high-confidence mutation *rrs* A1401G were shown to be resistant to KAN and AMK but susceptible to CAP.

| <b>Table 5: Discordance noted in genotypic and phenotypic tests</b> |                                                                                   |                                         |                                              |                          |                                                                          |                               |
|---------------------------------------------------------------------|-----------------------------------------------------------------------------------|-----------------------------------------|----------------------------------------------|--------------------------|--------------------------------------------------------------------------|-------------------------------|
| <b>Drugs</b>                                                        | <b>Targeted Loci</b>                                                              | <b>Loci containing the mutations</b>    | <b>Mutations</b>                             | <b>Number of Isolate</b> | <b>Genotypic drug susceptibility inferred by Sequencing-based method</b> | <b>Phenotypic DST Results</b> |
| INH                                                                 | <i>katG</i> , <i>Rv1910c - furA intergenic region</i> , <i>mabA-inhA</i> promoter | <i>katG</i>                             | Gln461STOP <sup>a</sup>                      | 1                        | Susceptible                                                              | Resistant                     |
|                                                                     |                                                                                   | <i>katG</i>                             | Pro232Leu <sup>a</sup>                       | 1                        | Susceptible                                                              | Resistant                     |
|                                                                     |                                                                                   | <i>katG</i>                             | AAA554AAAA(INSIns) <sup>a</sup>              | 1                        | Susceptible                                                              | Resistant                     |
|                                                                     |                                                                                   | <i>katG</i>                             | Phe657Ser <sup>a</sup>                       | 1                        | Susceptible                                                              | Resistant                     |
|                                                                     |                                                                                   | No mutations found in all targeted loci |                                              |                          | 3                                                                        | Susceptible                   |
| RIF                                                                 | <i>rpoB</i>                                                                       | <i>rpoB</i>                             | His526Leu                                    | 1                        | Resistant                                                                | Susceptible                   |
| EMB                                                                 | <i>embB</i> , <i>ubiA</i>                                                         | <i>embB</i>                             | Asp354Ala <sup>a</sup>                       | 2                        | Susceptible                                                              | Resistant                     |
|                                                                     |                                                                                   | <i>embB</i>                             | Glu378Ala <sup>a</sup>                       | 2                        | Susceptible                                                              | Resistant                     |
|                                                                     |                                                                                   | <i>ubiA</i>                             | Glu149Asp <sup>a</sup>                       |                          |                                                                          |                               |
|                                                                     |                                                                                   | <i>embB</i>                             | Met306Val <sup>a</sup>                       | 3                        | Resistant                                                                | Susceptible                   |
|                                                                     |                                                                                   | No mutations found in all targeted loci |                                              |                          | 1                                                                        | Susceptible                   |
| PZA                                                                 | <i>pncA</i>                                                                       | <i>pncA</i>                             | 128 GTC > G_C (T_Del P 2288859) <sup>a</sup> | 1                        | Susceptible                                                              | Resistant                     |
|                                                                     |                                                                                   | No mutations found in all targeted loci |                                              | 1                        | Susceptible                                                              | Resistant                     |
| STR                                                                 | <i>rpsL</i> , <i>rrs</i>                                                          | No mutations found in all targeted loci |                                              | 5                        | Susceptible                                                              | Resistant                     |
| CAP                                                                 | <i>rrs</i> , <i>tlyA</i>                                                          | <i>rrs</i>                              | A1401G                                       | 2                        | Resistant                                                                | Susceptible                   |
| KAN                                                                 | <i>rrs</i> , <i>eis</i> , <i>whiB7</i>                                            | No mutations found in all targeted loci |                                              | 1                        | Susceptible                                                              | Resistant                     |
| FQ                                                                  | <i>gyrA</i> , <i>gyrB</i>                                                         | <i>gyrA</i>                             | Asp94Arg                                     | 1                        | Resistant                                                                | Susceptible <sup>b</sup>      |
|                                                                     |                                                                                   | <i>gyrA</i>                             | Val235Val <sup>a</sup>                       | 1                        | Susceptible                                                              | Resistant                     |
|                                                                     |                                                                                   | <i>gyrB</i>                             | Ser447Phe <sup>a</sup>                       | 1                        | Susceptible                                                              | Resistant                     |

<sup>a</sup> Out-of-panel (non-targeted) mutations identified in the targeted loci in *M. tuberculosis* isolates with discordant genotypic and phenotypic DST results.

<sup>b</sup> The isolate was phenotypically resistant to OFX but susceptible to MOX.

## **Turn-around Times and Cost Assessments of the MiSeq and MinION Sequencing Workflows**

The accumulated occupation hours from the DNA extraction from MGIT culture to the generation of a report by BacterioChek-TB were 38 and 15 hours for the MiSeq and MinION workflows, respectively. In a laboratory with daily working hours of 9:00 am to 5:00 pm, genotypic DSTs generated using the MiSeq and MinION workflows could be available in 4 and 3 days, respectively. In other words, the MiSeq and MinION workflows respectively reported drug susceptibility results for first-line agents 9 and 10 days earlier than the 13-day protocol required for MGIT 960 SIRE. A full-panel genotypic DST of 12 anti-TB agents could be delivered for treatment guidance at least 17 and 18 days earlier than the pDST results, respectively (**Figure 5**).

The running costs per sample (including reagents and consumables) were US\$67.83 for MiSeq sequencing (24 samples/run) and US\$71.56 for MinION sequencing (12 samples/run) (**Table 6**).



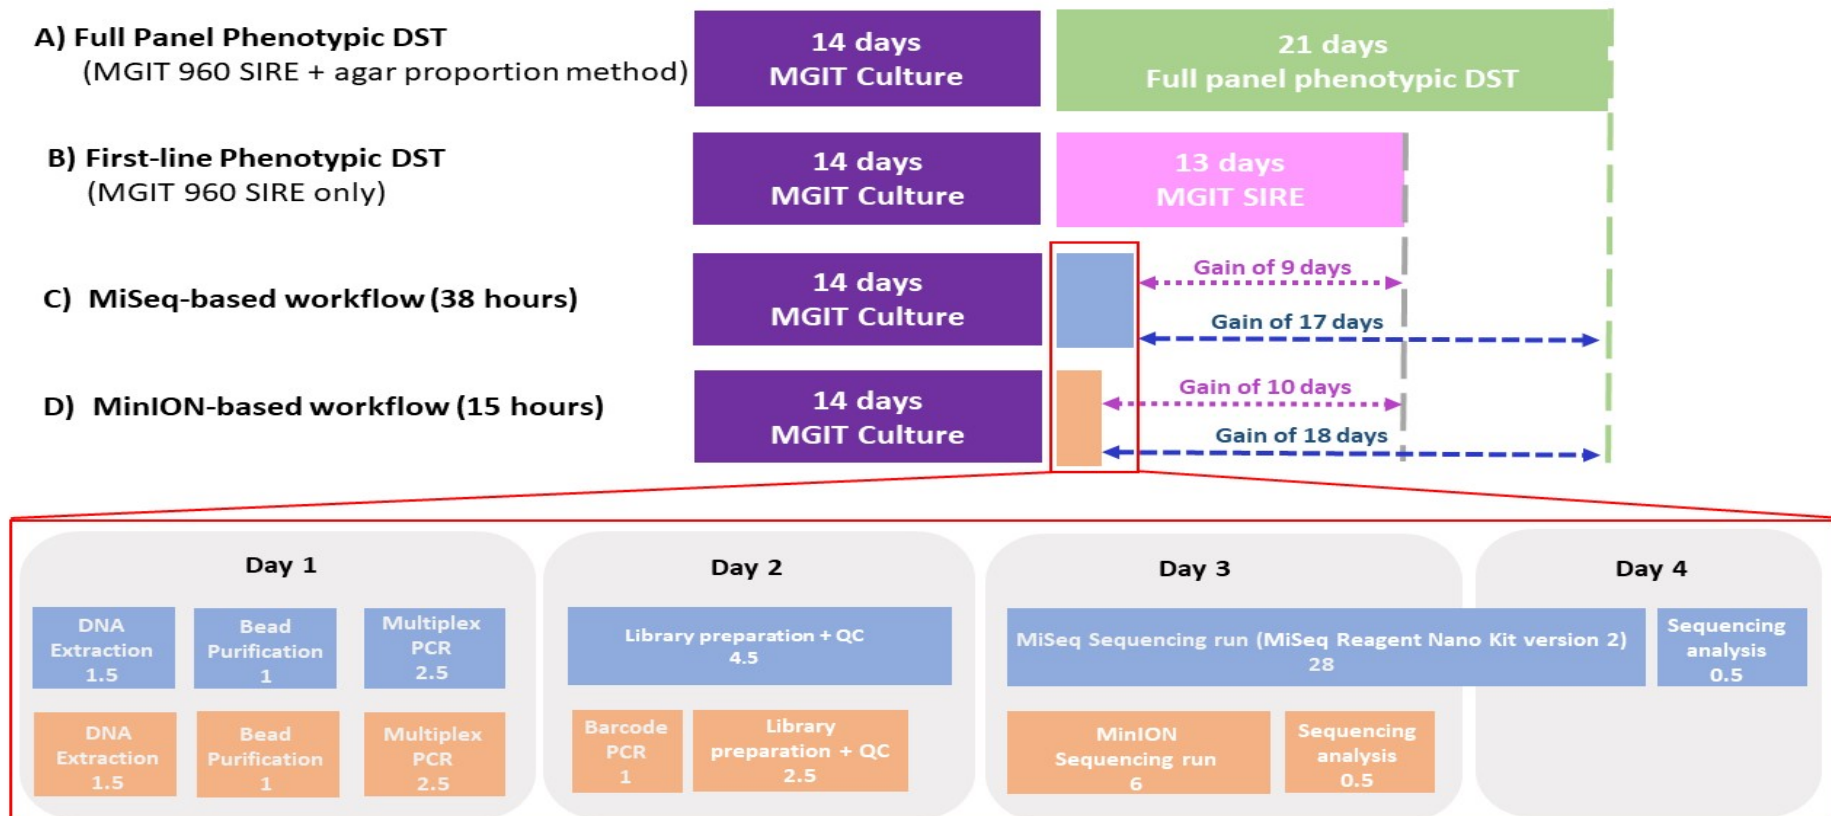

**Figure 5:** Illustration of the turnaround time of phenotypic drug susceptibility test (pDST) versus our sequence-based assays. Archived *M. tuberculosis* strains were incubated in MGIT broth for 14 days before subjecting to **(A)** a full panel of pDST, including MGIT 960 SIRE (13 days), MGIT 960 PZA (21 days) and agar proportion method for 2<sup>nd</sup> line drugs (21 days); **(B)** MGIT 960 SIRE only (13 days); **(C)** MiSeq sequencing workflow, which requires about 38 hours – DNA extraction (1.5 hrs), 1.8X bead purification (1 hr), multiplex PCR (2.5hrs), library preparation including fragmentation and adapter ligation, Bioanalyzer and quantitative real-time PCR assessment (4.5 hours), Sequencing run (28 hours) and sequencing analysis (0.5 hrs); **(D)** MinION sequencing workflow, which requires about 15 hours- DNA extraction (1.5 hrs), 1.8X bead purification (1 hr), multiplex PCR (2.5hrs), barcoding PCR (1hr), library preparation plus quality and quantity check (2.5 hrs), sequencing run (6hrs) and sequencing analysis (0.5hrs). Note: The boxes are not to the scale

| <b>Steps in the sequencing-based workflow</b>   | <b>MiSeq workflow</b>        | <b>MinION workflow</b>       |
|-------------------------------------------------|------------------------------|------------------------------|
|                                                 | <b>Cost per sample (USD)</b> | <b>Cost per sample (USD)</b> |
| DNA extraction<br>(DNA extraction, DNA cleanup) | 3.54                         | 3.54                         |
| Target enrichment<br>(multiplex PCR)            | 4.04                         | 4.04                         |
| Library preparation                             | 27.82                        | 15.69                        |
| Quality control                                 | 13.42                        | 2.45                         |
| Sequencing                                      | 19.01                        | 45.85                        |
| <b>Total cost per sample</b>                    | <b>67.83</b>                 | <b>71.56</b>                 |

## Discussion

The translation of sequencing-based workflows from research laboratories to clinical settings requires an evaluation of the analytical and diagnostic performance and an assessment of usability in terms of costs and turnaround times. This was the first study to evaluate and compare the uses of Illumina and Nanopore sequencing platforms for the targeted sequencing-based drug resistance profiling of *M. tuberculosis* cultures.

Instead of sequencing the whole genome of *M. tuberculosis* (4.4 Mb), the total region size to be sequenced (i.e., sum of 19 genetic regions) was only 18,346 bp. This facilitates the simultaneous analysis of multiple samples in one flow cell via barcoding on both platforms. In this study, a batch run of 24 samples on MiSeq yielded an average depth of coverage of 1,127 $\times$  per sample. Nevertheless, the depth of coverage was not consistent across the 19 target regions. The average coverage of long loci could be as low as 455 $\times$ , while the short loci achieved 2,592 $\times$ . Likewise, the MinION workflow also yielded an inconsistent depth of coverage across the target loci. While the shortest locus, *atpE*, achieved an average read depth of 3,380 $\times$ , the longest target, *rpsA*, had an average read depth of only 223 $\times$ . The low read depths of long loci limited the capacity for scaling up the batch size given that the recommended depth of coverage for each locus in a BacterioChek-TB analysis is 100 $\times$ . Accordingly, the maximum batch size should be approximately 108 samples per run for MiSeq workflow and 24 samples per run for MinION. The inconsistent coverage could be attributed to amplification bias during multiplex PCR, wherein PCR polymerase preferably amplifies shorter DNA fragments which consequently outnumbered long DNA fragments in the resultant mixture of amplicons.

While the Illumina platform has been deployed widely for clinical purposes (46), the manufacturer of the Nanopore MinION insisted that the current version of the platform was not intended for clinical applications, possibly because of relatively high basecalling error rate. Still, it would be interesting to determine the agreement between the MinION and Illumina platforms in terms of the identification of genetic variants, as this would allow us to explore the potential usefulness of the former for the diagnosis of drug-resistant TB. As the same pipeline was used for the analysis of both datasets, any differences in variant calls should be driven solely by sequencer differences. Initially, we defined an allele frequency threshold of 10% for both MiSeq and MinION and observed a variant call percent agreement of 1.84%. As the reported accuracy of the basecaller (Albacore v.2.3.3) for MinION data was

88%, we expected a good concordance if the threshold level was increased to 20% for MinION. Unfortunately, the agreement only increased to 16.78%. More than 81% of these ‘faked’ variants were identified in *rrs* and *rrl* (**Supplementary Table 4**). The high GC contents and repeating sequences in these regions might have worsened the basecalling accuracy. Perfect agreement between the two platforms was finally achieved at a threshold of 40%, indicating that the allele frequencies of the ‘faked’ variants due to basecalling errors was always <40%. Notably, the percent agreement decreased to 97.67% when the allele frequency threshold was increased further to 50%. Some true variants which were identified at an allele frequency >95.0% by MiSeq were reported by MinION at a prevalence of only 45–48% and were excluded at a threshold level of 50%.

In this study, all 163 *M. tuberculosis* cultures were resuscitated from frozen stocks of pure strains. No heterogenous drug susceptibility was expected. However, in clinical settings, *M. tuberculosis* cultures inoculated from respiratory specimens may contain mixed populations of drug-susceptible and drug-resistant strains. While highly specific variant calling could be achieved by MinION by setting an allele frequency threshold of 40%, the sensitivity of this platform to detect minor variants remained uncertain.

Our results showed that the proportions of drug-resistant subpopulations in heterogeneous samples should be large enough to generate a read depth that exceed the allele frequency threshold in order to report the drug-resistant variants. For instance, the drug-resistant strain should comprise at least 20% of the total population to ensure that all six drug resistance mutations would be detected by the MiSeq workflow at the frequency threshold of 10%. Similarly, for the MinION workflow, the drug-resistant subpopulation had to be increased to 50% of the total to ensure that all drug-resistance mutations were reported at a frequency of  $\geq 40\%$ .

The MiSeq workflow obviously outperformed the MinION workflow in terms of the analytical sensitivity to detect minor drug-resistant variants. Previous studies (13, 47) have demonstrated that MiSeq sequencing can identify ultralow heteroresistance, defined as a level significantly lower than the current threshold. Conversely, the MinION workflow would probably miss resistance caused by low-frequency alleles (<40%). Our finding was similar to that of Ammar *et al.*, who reported the detection of variants from heterogeneous samples using MinION only if their frequencies > 34% (48).

One key feature of this study was the inclusion of numerous highly resistant *M. tuberculosis* isolates (including MDR-TB, n=60 and XDR-TB, n=10) with diversified drug resistance mutation patterns. Using pDST as a reference standard, both workflows achieved an average sensitivity of 94.8% and specificity of 98.0%, which were higher than the targets set by the WHO for new molecular assays (90% and 95%, respectively) (49). Most importantly, all MDR-TB and XDR-TB isolates in our collection were successfully identified.

The sequencing-based method also correctly identified drug-resistant isolates harbouring rare drug resistance mutations, such as *rpoB* Ill572Phe, *rrs* C492T and *gyrA* Ala74Phe, which were generally outside the target panels of the existing molecular tests (5-7, 50). In addition, molecular diagnostic tools for genotypic predictions of PZA resistance are lacking. It is because the drug resistance variants are scattered across the *pncA* gene and no hotspot mutations are known. Notably, our sequencing-based methods identified 95.5% (42/44) of the PZA-resistant isolates, which exhibited 17 different mutation patterns.

Discordant genotypic and phenotypic resistance data were observed for some isolates, indicating that the genetic mechanisms underlying drug resistance in *M. tuberculosis* are yet to be fully elucidated. Specifically, a significant number of drug-resistant isolates carrying out-of-panel or novel mutations in the targeted loci were not reported as resistance by either sequencing method. For instance, four INH-resistant isolates were found to harbour novel *katG* variants. The causative roles of these mutations in conferring INH resistance remain to be validated experimentally. They will be included in the panel once their roles have been confirmed. Similar follow-up studies will be performed to validate the causative roles of novel variants in *embB*, *pncA*, *gyrA* and *gyrB* identified in this study. Consequently, the drug resistance mutation panel will be expanded continuously to improve the diagnostic performance.

Moreover, some drug-resistant isolates did not harbour any mutations in the targeted genetic regions. For instance, 6.9% (5/72) of STR-resistant isolates harboured no known mutations across *rrs* and *rpsL*. Drug resistance might thus be attributed to mutations located on another genomic region, such as *gidB* (51).

Several isolates harbouring high-confidence mutations were found to be phenotypically susceptible to the respective antibiotics. MiSeq and MinION sequencing analyses were repeated, and the same genotypic results were obtained. It should be noted that phenotypic susceptibility tests fundamentally measure the growth rate as a proxy for resistance. Slow

growth (>21 days) during the DST may explain the false susceptibility in samples harbouring these mutations (52).

In this study, MinION sequencing required 6 hours, resulting in a total operation time of 15 hours. This was much shorter than the 38 hours required to complete the MiSeq workflow. A full-panel genotypic DST could be delivered for treatment guidance at least 1 day earlier than the MiSeq results, and approximately 18 days earlier than the pDST results.

A batch run of 12 samples on the MinION platform yielded a cost per sample of US\$71.56, which excluded instrument and personnel costs. As discussed above, the batch size could be increased to a maximum of 24 samples, which would reduce the per-sample cost to a minimum of US\$35.78. However, this price is not comparable to that of the MiSeq workflow, for which the high capacity for sample batching has driven down the costs. Specifically, the cost per sample in a MiSeq run was US\$67.83 at a batch size of 24 samples. This cost could be reduced to approximately US\$15 at a maximum batch size of 108 samples when using the MiSeq Reagent Nano Kit. Additionally, standard and micro versions of the MiSeq Reagent Kits are available. These versions have higher data outputs and enable larger batch sizes, both of which could eventually reduce the cost per sample even further.

However, we note that the numbers of samples in regional clinical centres that provide individualised care are unlikely to maximise the batching capacity of the MiSeq workflow. Instead, smaller batch sizes might decrease the time-to-results by reducing the time needed to collect a minimum number of samples per batch. Therefore, the reduced capital cost, simpler workflow and lower-throughput capabilities favour the MinION over the MiSeq in regional clinical settings that provide individualised care. Conversely, MiSeq is a better choice in high-throughput settings such as reference laboratories, where sample batching can be optimised to minimise costs at the expense of workflow complexity and time.

This study had several shortcomings. First, cultures of archived *M. tuberculosis* strains were used as the input samples for sequencing. However, the ability to conduct sequencing on patient samples directly (i.e., without requiring a culture) will be more appropriate for both patient care and surveillance. Second, phenotypic drug resistance profiles were not equally available for all isolates included in this study, and test results were unavailable for BDQ and LZD. This variable availability of data limited the evaluation of our sequence-based assay, particularly for these two drugs. Finally, although we compiled several established drug resistance-associated mutations in our drug resistance mutation panel, not all these mutations

were present in our collection of clinical isolates. Therefore, we could not assess the ability of our assays to detect these rare mutations.

## **Conclusions**

Our study presented two targeted-sequencing workflows based on the Illumina MiSeq and nanopore MinION platforms for the rapid and comprehensive determination of drug-resistance in *M. tuberculosis* cultures. The diagnostic performance of the MinION platform was comparable to that of the commonly used MiSeq platform, which demonstrates the potential interchangeability of different sequencers in a laboratory setting. Both workflows enabled us to provide accurate and actionable results for the treatment of TB. Batching-based price constraints led to a higher sequencing cost per sample on the MinION platform than on the MiSeq platform under conditions of optimal batching. However, the MinION enabled a more open-access workflow, as fewer samples were batched per sequencing run. Therefore, we recommend the MiSeq workflow for high-throughput settings such as reference laboratories, and the MinION workflow for use in clinical settings that provide individualised care.

## **Ethical Approval**

The study protocols were approved by the ethical approval committees of the College of Health Arsi University (A/U/H/C/87/4016) and The Hong Kong Polytechnic University (HSEARS20161212001).

## **Consent for publication**

Not applicable

## **Availability of data and materials**

All raw sequencing data generated from MiSeq and MinION have been deposited under NCBI BioProject Sequence Read Archive (project accession PRJNA557083).

## **Funding**

This work was supported by (i) the Health and Medical Research Fund (Grant number: 16150072), which is administered under Food and Health Bureau, the Government of Hong Kong Special Administrative Region, and (ii) the Innovation and Technology Fund - Innovation and Technology Support Programme – Tier 3 (Grant number: ITS/342/17), which is administered under Innovation and Technology Commission, the Government of Hong Kong Special Administrative Region. These funding bodies did not have a role in the design of the study and collection, analysis and interpretation of data and in writing the manuscript.

## **Authors' contributions**

KT, TN, WY, GS conceived and designed the study; KT, TN, HL, RR, CC and GS performed laboratory experiments and sequencing; KL, KGT, BN, GA, and WY contributed *M. tuberculosis* cultures or phenotypic DST data; DG and CS developed the analysis pipeline; KT, TL, ST, LH and GS performed sequencing and statistical analysis; OM, WY and GK secured research funding for this project; KT, TN, HL and GS wrote/drafted and finalised the manuscript with contributions from all other authors. The final manuscript was read and approved by all authors.



## **Competing interests**

DG and CS are the developer of the analysis pipeline, Bacteriochek-TB. They did not have a role in the design of the study and collection, analysis and interpretation of data.

## **Acknowledgements**

We wish to thank Oxford Nanopore Technologies Ltd. for their professional technical support and advices for nanopore sequencing and subsequent data analysis.

## Reference

1. Velayati AA, Farnia P, Masjedi MR. 2013. The totally drug resistant tuberculosis (TDR-TB). *Int J Clin Exp Med* 6:307-9.
2. Demers A-M, Venter A, Friedrich SO, Rojas-Ponce G, Mapamba D, Jugheli L, Sasamalo M, Almeida D, Dorasamy A, Jentsch U, Gibson M, Everitt D, Eisenach KD, Diacon AH. 2016. Direct susceptibility testing of *Mycobacterium tuberculosis* for pyrazinamide using the BACTEC MGIT 960 system. *J Clin Microbiol* 54:1276-81.
3. Farhat MR, Sultana R, Iartchouk O, Bozeman S, Galagan J, Sisk P, Stolte C, Nebenzahl-Guimaraes H, Jacobson K, Sloutsky A. 2016. Genetic determinants of drug resistance in *Mycobacterium tuberculosis* and their diagnostic value. *Am J Respir Crit Care Med* 194:621-630.
4. Safi H, Lingaraju S, Amin A, Kim S, Jones M, Holmes M, McNeil M, Peterson SN, Chatterjee D, Fleischmann R. 2013. Evolution of high-level ethambutol-resistant tuberculosis through interacting mutations in decaprenylphosphoryl- $\beta$ -D-arabinose biosynthetic and utilization pathway genes. *Nat Genet* 45:1190.
5. Tomasicchio M, Theron G, Pietersen E, Streicher E, Stanley-Josephs D, Van Helden P, Warren R, Dheda K. 2016. The diagnostic accuracy of the MTBDRplus and MTBDRsl assays for drug-resistant TB detection when performed on sputum and culture isolates. *Sci Rep* 6:17850.
6. Meaza A, Kebede A, Yaregal Z, Dagne Z, Moga S, Yenew B, Diriba G, Molalign H, Tadesse M, Adisse D. 2017. Evaluation of genotype MTBDR plus VER 2.0 line probe assay for the detection of MDR-TB in smear positive and negative sputum samples. *BMC Infect Dis* 17:280.
7. Rufai SB, Kumar P, Singh A, Prajapati S, Balooni V, Singh S. 2014. Comparison of Xpert MTB/RIF with Line Probe Assay for detection of Rifampicin mono-resistant *Mycobacterium tuberculosis*. *J Clin Microbiol* 52:1846–1852.
8. Zhang H, Li D, Zhao L, Fleming J, Lin N, Wang T, Liu Z, Li C, Galwey N, Deng J. 2013. Genome sequencing of 161 *Mycobacterium tuberculosis* isolates from China identifies genes and intergenic regions associated with drug resistance. *Nat Genet* 45:1255.
9. Dheda K, Gumbo T, Maartens G, Dooley KE, McNerney R, Murray M, Furin J, Nardell EA, London L, Lessem E. 2017. The epidemiology, pathogenesis, transmission, diagnosis, and management of multidrug-resistant, extensively drug-resistant, and incurable tuberculosis. *Lancet Respir Med* 5:291-360.
10. World Health Organization. 2018. Global tuberculosis report 2018. Geneva, Switzerland.
11. Witney AA, Gould KA, Arnold A, Coleman D, Delgado R, Dhillon J, Pond M, Pope CF, Planche TD, Stoker NG. 2015. Clinical application of whole genome sequencing to inform treatment for multi-drug resistant tuberculosis cases. *J Clin Microbiol* 53:1473-83.
12. Witney AA, Cosgrove CA, Arnold A, Hinds J, Stoker NG, Butcher PD. 2016. Clinical use of whole genome sequencing for *Mycobacterium tuberculosis*. *BMC Med* 14:46.
13. Colman RE, Schupp JM, Hicks ND, Smith DE, Buchhagen JL, Valafar F, Crudu V, Romancenco E, Noroc E, Jackson L. 2015. Detection of low-level mixed-population drug resistance in *Mycobacterium tuberculosis* using high fidelity amplicon sequencing. *PloS One* 10:e0126626.
14. Walker TM, Kohl TA, Omar SV, Hedge J, Elias CDO, Bradley P, Iqbal Z, Feuerriegel S, Niehaus KE, Wilson DJ. 2015. Whole-genome sequencing for prediction of *Mycobacterium tuberculosis* drug susceptibility and resistance: a retrospective cohort study. *Lancet Infect Dis* 15:1193-1202.
15. Magi A, Giusti B, Tattini L. 2016. Characterization of MinION nanopore data for resequencing analyses. *Brief Bioinform* 18:940-953.
16. Ip CL, Loose M, Tyson JR, de Cesare M, Brown BL, Jain M, Leggett RM, Eccles DA, Zalunin V, Urban JM. 2015. MiniON Analysis and Reference Consortium: Phase 1 data release and analysis. *F1000Research* 4:1075.

17. Orsini P, Minervini CF, Cumbo C, Anelli L, Zagaria A, Minervini A, Coccaro N, Tota G, Casieri P, Impera L. 2018. Design and MinION testing of a nanopore targeted gene sequencing panel for chronic lymphocytic leukemia. *Sci Rep* 8:11798.
18. Yam W, Tam C, Leung C, Tong H, Chan K, Leung E, Wong K, Yew W, Seto W, Yuen K. 2004. Direct detection of rifampin-resistant *Mycobacterium tuberculosis* in respiratory specimens by PCR-DNA sequencing. *J Clin Microbiol* 42:4438-4443.
19. Flandrois J-P, Lina G, Dumitrescu O. 2014. MUBII-TB-DB: a database of mutations associated with antibiotic resistance in *Mycobacterium tuberculosis*. *BMC Bioinform* 15:107.
20. Sandgren A, Strong M, Muthukrishnan P, Weiner BK, Church GM, Murray MB. 2009. Tuberculosis drug resistance mutation database. *PLoS Med* 6:e1000002.
21. Starks AM, Avilés E, Cirillo DM, Denkinge CM, Dolinger DL, Emerson C, Gallarda J, Hanna D, Kim PS, Liwski R. 2015. Collaborative effort for a centralized worldwide tuberculosis relational sequencing data platform. *Clinical Infectious Diseases* 61:S141-S146.
22. Siu GKH, Yam WC, Zhang Y, Kao RY. 2014. An upstream truncation of furA-katG operon confer high-level isoniazid resistance in a *Mycobacterium tuberculosis* clinical isolate with no known resistance associated mutations. *Antimicrob Agents Chemother* 58:6093-6100.
23. Siu GKH, Zhang Y, Lau TC, Lau RW, Ho P-L, Yew W-W, Tsui SK, Cheng VC, Yuen K-Y, Yam W-C. 2011. Mutations outside the rifampicin resistance-determining region associated with rifampicin resistance in *Mycobacterium tuberculosis*. *J Antimicrob Chemother* 66:730-733.
24. Shi W, Zhang X, Jiang X, Yuan H, Lee JS, Barry CE, 3rd, Wang H, Zhang W, Zhang Y. 2011. Pyrazinamide inhibits trans-translation in *Mycobacterium tuberculosis*. *Science* 333:1630-2.
25. Villellas C, Coeck N, Meehan CJ, Lounis N, de Jong B, Rigouts L, Andries K. 2017. Unexpected high prevalence of resistance-associated Rv0678 variants in MDR-TB patients without documented prior use of clofazimine or bedaquiline. *J Antimicrob Chemother* 72:684-690.
26. Villellas C, Aristimuno L, Vitoria MA, Prat C, Blanco S, Garcia de Viedma D, Dominguez J, Samper S, Ainsa JA. 2013. Analysis of mutations in streptomycin-resistant strains reveals a simple and reliable genetic marker for identification of the *Mycobacterium tuberculosis* Beijing genotype. *J Clin Microbiol* 51:2124-30.
27. Lingaraju S, Rigouts L, Gupta A, Lee J, Umubyeyi AN, Davidow AL, German S, Cho E, Lee JI, Cho SN, Kim CT, Alland D, Safi H. 2016. Geographic Differences in the Contribution of ubiA Mutations to High-Level Ethambutol Resistance in *Mycobacterium tuberculosis*. *Antimicrob Agents Chemother* 60:4101-5.
28. Zhang S, Chen J, Cui P, Shi W, Shi X, Niu H, Chan D, Yew WW, Zhang W, Zhang Y. 2016. *Mycobacterium tuberculosis* Mutations Associated with Reduced Susceptibility to Linezolid. *Antimicrob Agents Chemother* 60:2542-4.
29. Zimenkov DV, Nosova EY, Kulagina EV, Antonova OV, Arslanbaeva LR, Isakova AI, Krylova LY, Peretokina IV, Makarova MV, Safonova SG, Borisov SE, Gryadunov DA. 2017. Examination of bedaquiline- and linezolid-resistant *Mycobacterium tuberculosis* isolates from the Moscow region. *J Antimicrob Chemother* 72:1901-1906.
30. McNeil MB, Dennison DD, Shelton CD, Parish T. 2017. In Vitro Isolation and Characterization of Oxazolidinone-Resistant *Mycobacterium tuberculosis*. *Antimicrob Agents Chemother* 61.
31. Maus CE, Plikaytis BB, Shinnick TM. 2005. Molecular analysis of cross-resistance to capreomycin, kanamycin, amikacin, and viomycin in *Mycobacterium tuberculosis*. *Antimicrob Agents Chemother* 49:3192-7.
32. Maus CE, Plikaytis BB, Shinnick TM. 2005. Mutation of tlyA confers capreomycin resistance in *Mycobacterium tuberculosis*. *Antimicrob Agents Chemother* 49:571-7.
33. Ando H, Kitao T, Miyoshi-Akiyama T, Kato S, Mori T, Kirikae T. 2011. Downregulation of katG expression is associated with isoniazid resistance in *Mycobacterium tuberculosis*. *Mol Microbiol* 79:1615-28.

34. Reeves AZ, Campbell PJ, Sultana R, Malik S, Murray M, Plikaytis BB, Shinnick TM, Posey JE. 2013. Aminoglycoside cross-resistance in *Mycobacterium tuberculosis* due to mutations in the 5' untranslated region of *whiB7*. *Antimicrob Agents Chemother* 57:1857-65.
35. Miotto P, Cabibbe AM, Feuerriegel S, Casali N, Drobniewski F, Rodionova Y, Bakonyte D, Stakenas P, Pimkina E, Augustynowicz-Kopec E, Degano M, Ambrosi A, Hoffner S, Mansjo M, Werngren J, Rusch-Gerdes S, Niemann S, Cirillo DM. 2014. *Mycobacterium tuberculosis* pyrazinamide resistance determinants: a multicenter study. *MBio* 5:e01819-14.
36. Yadon AN, Maharaj K, Adamson JH, Lai YP, Sacchettini JC, Ioerger TR, Rubin EJ, Pym AS. 2017. A comprehensive characterization of *PncA* polymorphisms that confer resistance to pyrazinamide. *Nat Commun* 8:588.
37. Mitarai S, Kato S, Ogata H, Aono A, Chikamatsu K, Mizuno K, Toyota E, Sejimo A, Suzuki K, Yoshida S, Saito T, Moriya A, Fujita A, Sato S, Matsumoto T, Ano H, Suetake T, Kondo Y, Kirikae T, Mori T. 2012. Comprehensive multicenter evaluation of a new line probe assay kit for identification of *Mycobacterium* species and detection of drug-resistant *Mycobacterium tuberculosis*. *J Clin Microbiol* 50:884-90.
38. Maruri F, Sterling TR, Kaiga AW, Blackman A, van der Heijden YF, Mayer C, Cambau E, Aubry A. 2012. A systematic review of gyrase mutations associated with fluoroquinolone-resistant *Mycobacterium tuberculosis* and a proposed gyrase numbering system. *J Antimicrob Chemother* 67:819-31.
39. Makafe GG, Cao Y, Tan Y, Julius M, Liu Z, Wang C, Njire MM, Cai X, Liu T, Wang B, Pang W, Tan S, Zhang B, Yew WW, Lamichhane G, Guo J, Zhang T. 2016. Role of the *Cys154Arg* Substitution in Ribosomal Protein L3 in Oxazolidinone Resistance in *Mycobacterium tuberculosis*. *Antimicrob Agents Chemother* 60:3202-6.
40. Nguyen TVA, Anthony RM, Banuls AL, Nguyen TVA, Vu DH, Alffenaar JC. 2018. Bedaquiline Resistance: Its Emergence, Mechanism, and Prevention. *Clin Infect Dis* 66:1625-1630.
41. Xu J, Wang B, Hu M, Huo F, Guo S, Jing W, Nuermberger E, Lu Y. 2017. Primary Clofazimine and Bedaquiline Resistance among Isolates from Patients with Multidrug-Resistant Tuberculosis. *Antimicrob Agents Chemother* 61.
42. Zaunbrecher MA, Sikes RD, Jr., Metchock B, Shinnick TM, Posey JE. 2009. Overexpression of the chromosomally encoded aminoglycoside acetyltransferase *eis* confers kanamycin resistance in *Mycobacterium tuberculosis*. *Proc Natl Acad Sci U S A* 106:20004-9.
43. Huitric E, Verhasselt P, Koul A, Andries K, Hoffner S, Andersson DI. 2010. Rates and mechanisms of resistance development in *Mycobacterium tuberculosis* to a novel diarylquinoline ATP synthase inhibitor. *Antimicrob Agents Chemother* 54:1022-8.
44. Siddiqi S, Ahmed A, Asif S, Behera D, Javaid M, Jani J, Jyoti A, Mahatre R, Mahto D, Richter E. 2012. Direct drug susceptibility testing of *Mycobacterium tuberculosis* for rapid detection of multidrug resistance using the Bactec MGIT 960 system: a multicenter study. *J Clin Microbiol* 50:435-440.
45. Siddiqi S, Rusch-Gerdes S. 2006. MGIT procedure manual for BACTEC MGIT 960 TB system (also applicable for manual MGIT). Foundation Innovative New Diagnostics, Becton, Dickinson, Franklin Lakes, NJ.
46. Mamanova L, Coffey AJ, Scott CE, Kozarewa I, Turner EH, Kumar A, Howard E, Shendure J, Turner DJ. 2010. Target-enrichment strategies for next-generation sequencing. *Nat Methods* 7:111.
47. Metcalfe JZ, Streicher E, Theron G, Colman RE, Allender C, Lemmer D, Warren R, Engelthaler DM. 2017. Cryptic microheteroresistance explains *Mycobacterium tuberculosis* phenotypic resistance. *Am J Respir Crit Care Med* 196:1191-1201.
48. Ammar R, Paton TA, Torti D, Shlien A, Bader GD. 2015. Long read nanopore sequencing for detection of HLA and CYP2D6 variants and haplotypes. *F1000Research* 4.
49. World Health Organization. 2014. High priority target product profiles for new tuberculosis diagnostics: report of a consensus meeting, 28-29 April 2014. Geneva, Switzerland.

50. Pang Y, Dong H, Tan Y, Deng Y, Cai X, Jing H, Xia H, Li Q, Ou X, Su B. 2016. Rapid diagnosis of MDR and XDR tuberculosis with the MeltPro TB assay in China. *Sci Rep* 6:25330.
51. Pandey B, Grover S, Goyal S, Jamal S, Singh A, Kaur J, Grover A. 2019. Novel missense mutations in gidB gene associated with streptomycin resistance in Mycobacterium tuberculosis: insights from molecular dynamics. *J Biomol Struct Dyn* 37:20-35.
52. Van Deun A, Barrera L, Bastian I, Fattorini L, Hoffmann H, Kam KM, Rigouts L, Rusch-Gerdes S, Wright A. 2009. Mycobacterium tuberculosis strains with highly discordant rifampin susceptibility test results. *J Clin Microbiol* 47:3501-6.
